# Supplementary material for: Salt-Containing Recipes in Popular Magazines with the Highest Circulation in the United States Do Not Specify Iodized Salt in the Ingredient List
Source: MDPI journal article supplement (doi:10.3390/ijerph20054595), 2023-03-05
Supplement: s1 [file s1]

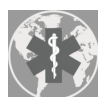

Short Communication

# Salt-Containing Recipes in Popular Magazines with the Highest Circulation in the United States Do Not Specify Iodized Salt in the Ingredient List

Josephine Uerling <sup>1</sup>, Emily Nieckula <sup>2</sup>, Katarina Mico <sup>1</sup>, Arantxa Bonifaz Rosas <sup>1</sup>, Emmie Cohen <sup>1</sup> and Helena Pachón <sup>1,2,\*</sup>

**Supplementary Materials:** Table S1: Recipes reviewed in this study.

| Name of magazine       | Issue date            | Recipe number | Recipe name                                               | Recipe contains salt? | How is salt described?     |
|------------------------|-----------------------|---------------|-----------------------------------------------------------|-----------------------|----------------------------|
| Taste of Home          | June /July 2021       | 407           | Zucchini pickles                                          | Yes                   | Canning salt               |
| Better Homes & Gardens | September 2021        | 119           | Crispy dill pickled chicken sandwiches                    | Yes                   | Celery salt or garlic salt |
| Better Homes & Gardens | February 2021         | 603           | Cayenne pepper mocktail                                   | Yes                   | Coarse Kosher salt         |
| Taste of Home          | October/November 2020 | 190           | Salty dog sangria                                         | Yes                   | Coarse sea salt            |
| People                 | 4 October 2021        | 637           | Carne asada jackfruit tacos                               | Yes                   | Fine sea salt              |
| Better Homes & Gardens | August 2021           | 105           | Citrus-ginger sports tonic                                | Yes                   | Fine Sea salt              |
| Better Homes & Gardens | February 2021         | 624           | Grapefruit & white chocolate cookies                      | Yes                   | Fine sea salt              |
| Good Housekeeping      | October 2020          | 684           | Caramel apple pie: for caramel                            | Yes                   | Flaked sea salt            |
| Cosmopolitan           | March 2021            | 985           | The most non-boring chicken recipe you'll make maybe ever | Yes                   | Flaky sea salt             |
| People                 | 30 August 2021        | 643           | Mixed tomato caprese salad with balsamic glaze            | Yes                   | Flaky sea salt             |
| Better Homes & Gardens | March 2021            | 7             | Salted pistachio meringues                                | Yes                   | Fleur de sel               |
| Taste of Home          | August/September 2020 | 155           | Nacho popcorn                                             | Yes                   | Garlic Salt                |

|                   |                       |      |                                                                                           |     |                    |
|-------------------|-----------------------|------|-------------------------------------------------------------------------------------------|-----|--------------------|
| Taste of Home     | October/November 2020 | 175  | Air-fryer almond chicken                                                                  | Yes | Garlic Salt        |
| US Weekly         | 18 October 2021       | 1001 | Cream of tomato soup                                                                      | Yes | Himalayan sea salt |
| Taste of Home     | February/March 2021   | 320  | Paçoca (Brazilian peanut candy)                                                           | Yes | Himalayan sea salt |
| AARP              | February/March 2021   | 937  | Beef and vegetable cocido                                                                 | Yes | Kosher salt        |
| AARP              | August/September 2021 |      | Braised red snapper with lemon & rosemary vinaigrette                                     | Yes | Kosher salt        |
| Cosmopolitan      | May/June 2021         | 953  | Nothing to see here, except a secret sauce that'll transform your boring workweek lunches | Yes | Kosher salt        |
| Cosmopolitan      | July/August 2021      | 961  | Please, just eat this glorious salad from Pepper Teigen                                   | Yes | Kosher salt        |
| Cosmopolitan      | September 2021        | 966  | Cancel your plans and make this sexy breakfast sando                                      | Yes | Kosher salt        |
| Cosmopolitan      | October 2020          | 974  | If you've got 25 minutes and a sheet pan, you're a chef now: the food                     | Yes | Kosher salt        |
| Cosmopolitan      | October 2020          | 975  | If you've got 25 minutes and a sheet pan, you're a chef now: the dressing                 | Yes | Kosher salt        |
| Cosmopolitan      | February 2021         | 991  | I'm sorry, you're saying you don't know what a snacking cake is?                          | Yes | Kosher salt        |
| Good Housekeeping | September 2021        | 653  | Salted chocolate-caramel cookies                                                          | Yes | Kosher salt        |
| Good Housekeeping | September 2021        | 655  | Chicken paprikash                                                                         | Yes | Kosher salt        |
| Good Housekeeping | September 2021        | 664  | Roasted cauliflower tacos                                                                 | Yes | Kosher salt        |
| Good Housekeeping | September 2021        | 665  | Quick & spicy vegan slaw                                                                  | Yes | Kosher salt        |

|                   |                |     |                                                        |     |             |
|-------------------|----------------|-----|--------------------------------------------------------|-----|-------------|
| Good Housekeeping | September 2021 | 666 | Cheese & herb stuffed chicken                          | Yes | Kosher salt |
| Good Housekeeping | September 2021 | 667 | Steak & arugula toasts                                 | Yes | Kosher salt |
| Good Housekeeping | September 2021 | 668 | Spaghetti & air fryer meatballs                        | Yes | Kosher salt |
| Good Housekeeping | September 2021 | 669 | Zucchini bread                                         | Yes | Kosher salt |
| Good Housekeeping | September 2021 | 671 | Roasted feta shrimp & polenta                          | Yes | Kosher salt |
| Good Housekeeping | October 2020   | 675 | Mossy cookies                                          | Yes | Kosher salt |
| Good Housekeeping | October 2020   | 680 | Chocolate pumpkin bread                                | Yes | Kosher salt |
| Good Housekeeping | October 2020   | 685 | Squash & spinach breakfast toasts                      | Yes | Kosher salt |
| Good Housekeeping | October 2020   | 686 | Roasted butternut squash salad with tahini vinaigrette | Yes | Kosher salt |
| Good Housekeeping | October 2020   | 687 | Slow cooker pot roast                                  | Yes | Kosher salt |
| Good Housekeeping | October 2020   | 688 | Baked rigatoni with meatballs                          | Yes | Kosher salt |
| Good Housekeeping | October 2020   | 690 | Brussels sprout pizza                                  | Yes | Kosher salt |
| Good Housekeeping | November 2020  | 701 | Quinoa-stuffed acorn squash with cranberries and feta  | Yes | Kosher salt |
| Good Housekeeping | November 2020  | 702 | Twice-baked sweet potatoes                             | Yes | Kosher salt |

|                   |               |     |                                               |     |             |
|-------------------|---------------|-----|-----------------------------------------------|-----|-------------|
| Good Housekeeping | November 2020 | 703 | Roasted brussels sprouts with browned butter  | Yes | Kosher salt |
| Good Housekeeping | November 2020 | 704 | Sheet pan sausage & egg breakfast bake        | Yes | Kosher salt |
| Good Housekeeping | November 2020 | 705 | Cookie-stuffed brownies                       | Yes | Kosher salt |
| Good Housekeeping | November 2020 | 709 | Herb stuffing: bacon & chestnut               | Yes | Kosher salt |
| Good Housekeeping | November 2020 | 710 | Herb stuffing: apple, pecan & dill            | Yes | Kosher salt |
| Good Housekeeping | November 2020 | 711 | Herb stuffing: cornbread, sausage & cherry    | Yes | Kosher salt |
| Good Housekeeping | November 2020 | 712 | Wild rice & cherry pilaf                      | Yes | Kosher salt |
| Good Housekeeping | November 2020 | 713 | Mushroom & chile-garlic green beans           | Yes | Kosher salt |
| Good Housekeeping | November 2020 | 714 | Ravioli with sautéed butternut squash & thyme | Yes | Kosher salt |
| Good Housekeeping | November 2020 | 719 | Curried rice with shrimp & peas               | Yes | Kosher salt |
| Good Housekeeping | November 2020 | 720 | Pie-spiced apple fritters                     | Yes | Kosher salt |
| Good Housekeeping | November 2020 | 726 | Chicken with sautéed apples and mushrooms     | Yes | Kosher salt |
| Good Housekeeping | November 2020 | 727 | Coriander-maple glazed carrots                | Yes | Kosher salt |
| Good Housekeeping | November 2020 | 729 | Bacon maple-orange turkey                     | Yes | Kosher salt |

|                   |               |     |                                               |     |             |
|-------------------|---------------|-----|-----------------------------------------------|-----|-------------|
| Good Housekeeping | November 2020 | 730 | Raspberry swirl rolls                         | Yes | Kosher salt |
| Good Housekeeping | November 2020 | 731 | Turkey sandwich                               | Yes | Kosher salt |
| Good Housekeeping | May 2021      | 733 | Lemon-thyme chicken                           | Yes | Kosher salt |
| Good Housekeeping | May 2021      | 734 | Blackened-fish tacos                          | Yes | Kosher salt |
| Good Housekeeping | May 2021      | 736 | Chicken cobb salad                            | Yes | Kosher salt |
| Good Housekeeping | May 2021      | 737 | Steak sandwich with grilled broccoli          | Yes | Kosher salt |
| Good Housekeeping | May 2021      | 738 | Lemon bundt cake: for cake                    | Yes | Kosher salt |
| Good Housekeeping | May 2021      | 740 | Thin mint cheesecake: for crust               | Yes | Kosher salt |
| Good Housekeeping | May 2021      | 742 | Spice-dusted pork with crunch vegetable salad | Yes | Kosher salt |
| Good Housekeeping | May 2021      | 743 | Blueberry buttermilk muffins                  | Yes | Kosher salt |
| Good Housekeeping | May 2021      | 744 | Crispy chicken with spring quinoa             | Yes | Kosher salt |
| Good Housekeeping | May 2021      | 746 | Cilantro-lime yogurt                          | Yes | Kosher salt |
| Good Housekeeping | May 2021      | 747 | Sriracha-honey vinaigrette                    | Yes | Kosher salt |
| Good Housekeeping | May 2021      | 748 | Roasted red pepper relish                     | Yes | Kosher salt |

|                   |            |     |                                                   |     |             |
|-------------------|------------|-----|---------------------------------------------------|-----|-------------|
| Good Housekeeping | May 2021   | 750 | Buffalo wing burger: for burgers                  | Yes | Kosher salt |
| Good Housekeeping | May 2021   | 751 | Celery and blue cheese slaw                       | Yes | Kosher salt |
| Good Housekeeping | May 2021   | 752 | Spinach-artichoke deep-dish pizza                 | Yes | Kosher salt |
| Good Housekeeping | May 2021   | 753 | Ceviche-style shrimp                              | Yes | Kosher salt |
| Good Housekeeping | May 2021   | 754 | Spicy bloody Mary                                 | Yes | Kosher salt |
| Good Housekeeping | May 2021   | 756 | Herb-infused sous vide steak                      | Yes | Kosher salt |
| Good Housekeeping | March 2021 | 761 | Barley with sautéed leeks, peas & parsley         | Yes | Kosher salt |
| Good Housekeeping | March 2021 | 762 | Wheat berries with thyme-roasted grapes & spinach | Yes | Kosher salt |
| Good Housekeeping | March 2021 | 763 | Parmesan egg-in-a-hole                            | Yes | Kosher salt |
| Good Housekeeping | March 2021 | 767 | Quick chicken mole                                | Yes | Kosher salt |
| Good Housekeeping | March 2021 | 769 | Chocolate hazelnut spread                         | Yes | Kosher salt |
| Good Housekeeping | March 2021 | 771 | Jerk shrimp wraps with mango slaw                 | Yes | Kosher salt |
| Good Housekeeping | March 2021 | 772 | Jerk shrimp wraps with mango slaw: jerk spice mix | Yes | Kosher salt |
| Good Housekeeping | March 2021 | 773 | Coconut-crusted chicken cutlets                   | Yes | Kosher salt |

|                   |            |     |                                                               |     |             |
|-------------------|------------|-----|---------------------------------------------------------------|-----|-------------|
| Good Housekeeping | March 2021 | 774 | Philly cheesesteaks                                           | Yes | Kosher salt |
| Good Housekeeping | March 2021 | 776 | Pulled pork nachos                                            | Yes | Kosher salt |
| Good Housekeeping | March 2021 | 777 | Greek chicken grain bowl                                      | Yes | Kosher salt |
| Good Housekeeping | March 2021 | 780 | Tex-Mex chicken salad                                         | Yes | Kosher salt |
| Good Housekeeping | March 2021 | 781 | Salmon Niçoise                                                | Yes | Kosher salt |
| Good Housekeeping | March 2021 | 782 | Cobb salad                                                    | Yes | Kosher salt |
| Good Housekeeping | March 2021 | 783 | Sweet potato & black bean tacos                               | Yes | Kosher salt |
| Good Housekeeping | March 2021 | 784 | White bean tuna salad                                         | Yes | Kosher salt |
| Good Housekeeping | June 2021  | 786 | Savory oatmeal with sautéed mushrooms and spinach             | Yes | Kosher salt |
| Good Housekeeping | June 2021  | 789 | Roasted strawberries                                          | Yes | Kosher salt |
| Good Housekeeping | June 2021  | 790 | Shrimp, zucchini and corn enchiladas                          | Yes | Kosher salt |
| Good Housekeeping | June 2021  | 792 | Grilled butterflied chicken: for chicken                      | Yes | Kosher salt |
| Good Housekeeping | June 2021  | 793 | Grilled butterflied chicken: for grilled scallions and citrus | Yes | Kosher salt |
| Good Housekeeping | June 2021  | 794 | Crispy chickpeas                                              | Yes | Kosher salt |

|                   |                  |     |                                                               |     |             |
|-------------------|------------------|-----|---------------------------------------------------------------|-----|-------------|
| Good Housekeeping | June 2021        | 795 | Caesar salad with grilled radishes: for vegan Caesar dressing | Yes | Kosher salt |
| Good Housekeeping | June 2021        | 796 | Caesar salad with grilled radishes: for salad                 | Yes | Kosher salt |
| Good Housekeeping | June 2021        | 797 | Gingery pork-meatball subs                                    | Yes | Kosher salt |
| Good Housekeeping | June 2021        | 798 | Sheet pan chicken fajitas                                     | Yes | Kosher salt |
| Good Housekeeping | June 2021        | 800 | Ricotta & fresh tomato pizza                                  | Yes | Kosher salt |
| Good Housekeeping | June 2021        | 801 | Zucchini, yellow squash & herb pizza                          | Yes | Kosher salt |
| Good Housekeeping | June 2021        | 804 | Strawberries: pickled-berry toast                             | Yes | Kosher salt |
| Good Housekeeping | June 2021        | 805 | Spiced cod with rice noodle salad                             | Yes | Kosher salt |
| Good Housekeeping | June 2021        | 806 | Barley salad with strawberries and buttermilk dressing        | Yes | Kosher salt |
| Good Housekeeping | June 2021        | 807 | Marinated flank steak                                         | Yes | Kosher salt |
| Good Housekeeping | June 2021        | 808 | Grilled broccoli                                              | Yes | Kosher salt |
| Good Housekeeping | July/August 2021 | 813 | White bean & broccolini salad                                 | Yes | Kosher salt |
| Good Housekeeping | July/August 2021 | 814 | Marinated mushrooms                                           | Yes | Kosher salt |
| Good Housekeeping | July/August 2021 | 815 | Heirloom tomato salad                                         | Yes | Kosher salt |



|                   |                       |     |                                      |     |             |
|-------------------|-----------------------|-----|--------------------------------------|-----|-------------|
| Good Housekeeping | July/August 2021      | 822 | Summer succotash                     | Yes | Kosher salt |
| Good Housekeeping | July/August 2021      | 823 | Barbecue ribs                        | Yes | Kosher salt |
| Good Housekeeping | July/August 2021      | 830 | Pecan crumble                        | Yes | Kosher salt |
| Good Housekeeping | July/August 2021      | 831 | Grilled fajita kebabs                | Yes | Kosher salt |
| Good Housekeeping | July/August 2021      | 832 | Pasta with no-cook tomato sauce      | Yes | Kosher salt |
| Good Housekeeping | July/August 2021      | 833 | Grilled peach caprese                | Yes | Kosher salt |
| Good Housekeeping | January/February 2021 | 838 | Spinach & artichoke baked pasta      | Yes | Kosher salt |
| Good Housekeeping | January/February 2021 | 839 | Cheesy jalapeño pretzel bites        | Yes | Kosher salt |
| Good Housekeeping | January/February 2021 | 842 | Chocolate heart cake                 | Yes | Kosher salt |
| Good Housekeeping | January/February 2021 | 845 | Warm pizza dip                       | Yes | Kosher salt |
| Good Housekeeping | January/February 2021 | 846 | Make-ahead egg-and-cheese sandwiches | Yes | Kosher salt |
| Good Housekeeping | January/February 2021 | 847 | BBQ beef & mashed potato pie         | Yes | Kosher salt |
| Good Housekeeping | January/February 2021 | 849 | Preserved lemons                     | Yes | Kosher salt |
| Good Housekeeping | January/February 2021 | 852 | Tunisian skillet chicken             | Yes | Kosher salt |

|                   |               |     |                                           |     |             |
|-------------------|---------------|-----|-------------------------------------------|-----|-------------|
| Good Housekeeping | December 2020 | 857 | Dashing through the snow sugar cookies    | Yes | Kosher salt |
| Good Housekeeping | December 2020 | 858 | Chocolate chip cookie<br>Santa sandwiches | Yes | Kosher salt |
| Good Housekeeping | December 2020 | 859 | Cranberry-pear tart                       | Yes | Kosher salt |
| Good Housekeeping | December 2020 | 860 | Vegetable torte                           | Yes | Kosher salt |
| Good Housekeeping | December 2020 | 861 | Classic latkes                            | Yes | Kosher salt |
| Good Housekeeping | December 2020 | 867 | Easy pork ragu                            | Yes | Kosher salt |
| Good Housekeeping | December 2020 | 868 | Hot pepper & onion<br>pizza               | Yes | Kosher salt |
| Good Housekeeping | December 2020 | 872 | Jammy ornament cutouts                    | Yes | Kosher salt |
| Good Housekeeping | December 2020 | 876 | Apple- and apricot-<br>stuffed pork loin  | Yes | Kosher salt |
| Good Housekeeping | December 2020 | 877 | Potato gnocchi with meat<br>sauce         | Yes | Kosher salt |
| Good Housekeeping | December 2020 | 878 | Best-ever holiday eggnog                  | Yes | Kosher salt |
| Good Housekeeping | December 2020 | 881 | Twice-baked citrus-<br>almond brioche     | Yes | Kosher salt |
| Good Housekeeping | December 2020 | 882 | Brussels sprout salad<br>with hazelnuts   | Yes | Kosher salt |
| Good Housekeeping | December 2020 | 885 | Gingerbread cookies for<br>houses         | Yes | Kosher salt |

|                   |            |     |                                         |     |             |
|-------------------|------------|-----|-----------------------------------------|-----|-------------|
| Good Housekeeping | April 2021 | 886 | Carrot-pineapple cupcakes: for cupcakes | Yes | Kosher salt |
| Good Housekeeping | April 2021 | 889 | Meyer lemon madeleines                  | Yes | Kosher salt |
| Good Housekeeping | April 2021 | 890 | Silky coconut cream pie                 | Yes | Kosher salt |
| Good Housekeeping | April 2021 | 891 | Flaky pie crust                         | Yes | Kosher salt |
| Good Housekeeping | April 2021 | 892 | Slow-cooker porridge                    | Yes | Kosher salt |
| Good Housekeeping | April 2021 | 893 | Pea fritters with shrimp salad          | Yes | Kosher salt |
| Good Housekeeping | April 2021 | 894 | Dill-crusted pork and farro salad       | Yes | Kosher salt |
| Good Housekeeping | April 2021 | 895 | Mashed potatoes and greens              | Yes | Kosher salt |
| Good Housekeeping | April 2021 | 896 | Ham & cheese bread pudding              | Yes | Kosher salt |
| Good Housekeeping | April 2021 | 897 | Easy Easter roast                       | Yes | Kosher salt |
| Good Housekeeping | April 2021 | 899 | Mexican skirt steak and avocado salad   | Yes | Kosher salt |
| Good Housekeeping | April 2021 | 900 | Spring vegetable pizza                  | Yes | Kosher salt |
| Good Housekeeping | April 2021 | 902 | Sugared lavender cupcakes: for cupcakes | Yes | Kosher salt |
| Good Housekeeping | April 2021 | 905 | Pecan berry bursts                      | Yes | Kosher salt |

|                   |                   |     |                                                                                |     |             |
|-------------------|-------------------|-----|--------------------------------------------------------------------------------|-----|-------------|
| Good Housekeeping | April 2021        | 906 | Crispy mustard chicken with spring potato salad                                | Yes | Kosher salt |
| Good Housekeeping | April 2021        | 910 | Greek yogurt pancakes                                                          | Yes | Kosher salt |
| Good Housekeeping | April 2021        | 911 | Garlicky roasted radish bruschetta                                             | Yes | Kosher salt |
| Good Housekeeping | April 2021        | 912 | Dill dip                                                                       | Yes | Kosher salt |
| Good Housekeeping | April 2021        | 913 | Charred scallion tart                                                          | Yes | Kosher salt |
| Good Housekeeping | April 2021        | 914 | Spring green panzanella                                                        | Yes | Kosher salt |
| Good Housekeeping | April 2021        | 915 | Roasted asparagus with feta vinaigrette                                        | Yes | Kosher salt |
| Good Housekeeping | July/August 2021  |     | Blueberry crème fraîche semifreddo with pecan crumble: blueberry sauce/filling | Yes | Kosher salt |
| Good Housekeeping | July/August 2021  |     | Blueberry crème fraîche semifreddo with pecan crumble: semifreddo base         | Yes | Kosher salt |
| Good Housekeeping | July/August 2021  |     | Green slaw: coleslaw dressing                                                  | Yes | Kosher salt |
| Good Housekeeping | December 2020     |     | Roasted orange-ginger chicken and mushrooms                                    | Yes | Kosher salt |
| Good Housekeeping | November 2020     |     | Herb stuffing                                                                  | Yes | Kosher salt |
| Good Housekeeping | October 2020      |     | Caramel apple pie                                                              | Yes | Kosher salt |
| People            | 27 September 2021 | 628 | Pizza with eggs, zucchini & salami                                             | Yes | Kosher salt |
| People            | 27 September 2021 | 629 | Key lime pie with coconut whipped cream                                        | Yes | Kosher salt |

|               |                       |      |                                                  |     |             |
|---------------|-----------------------|------|--------------------------------------------------|-----|-------------|
| People        | 20 September 2021     | 630  | Guacamole with serrano & cayenne                 | Yes | Kosher salt |
| People        | 20 September 2021     | 631  | Broccoli rabe pesto pasta                        | Yes | Kosher salt |
| People        | 13 September 2021     | 632  | Horseradish-cheddar burgers                      | Yes | Kosher salt |
| People        | 13 September 2021     | 633  | Chilled Greek watermelon salad                   | Yes | Kosher salt |
| People        | 11 October 2021       | 635  | Pork & vegetable lo mein                         | Yes | Kosher salt |
| People        | 11 October 2021       | 636  | French onion soup                                | Yes | Kosher salt |
| People        | 4 October 2021        | 638  | Mapo pork with hummus                            | Yes | Kosher salt |
| People        | 4 October 2021        | 639  | Spaghetti with lentils                           | Yes | Kosher salt |
| People        | 30 August 2021        | 644  | Barbecue pork spareribs                          | Yes | Kosher salt |
| People        | 23 August 2021        | 646  | Latin-Caribbean braised chicken with garlic rice | Yes | Kosher salt |
| People        | 16 August 2021        | 647  | Crispy coconut & curry shrimp                    | Yes | Kosher salt |
| People        | 16 August 2021        | 648  | Korean-inspired sloppy joes with quick pickles   | Yes | Kosher salt |
| People        | 16 August 2021        | 649  | Rosemary & garlic pork tenderloin                | Yes | Kosher salt |
| People        | 2 August 2021         | 652  | Grilled skirt steak nachos                       | Yes | Kosher salt |
| US Weekly     | 11 October 2021       | 1002 | Stuffed pesto chicken breast                     | Yes | Kosher salt |
| US Weekly     | 28 June 2021          |      | Beet and brown rice burgers                      | Yes | Kosher salt |
| Taste of Home | December/January 2021 | 255  | Cream cheese red velvet thumbprint cookies       | Yes | Kosher salt |
| Taste of Home | December/January 2021 | 260  | The best hummus                                  | Yes | Kosher salt |
| Taste of Home | February/March 2021   | 287  | Easy one-dish king cake                          | Yes | Kosher salt |
| Taste of Home | February/March 2021   | 296  | Guacamole                                        | Yes | Kosher salt |
| Taste of Home | April/May 2021        | 369  | Polpetta di Mamma                                | Yes | Kosher salt |
| Taste of Home | June/July 2021        | 390  | Watermelon pizza                                 | Yes | Kosher salt |
| Taste of Home | June/July 2021        | 438  | Farro salad with charred shishito peppers & corn | Yes | Kosher salt |
| Taste of Home | June/July 2021        | 441  | Cherry tomato pasta with avocado sauce           | Yes | Kosher salt |
| Taste of Home | August/September 2021 | 462  | Beef short ribs vindaloo                         | Yes | Kosher salt |

|                        |                       |     |                                                                   |     |             |
|------------------------|-----------------------|-----|-------------------------------------------------------------------|-----|-------------|
| Taste of Home          | August/September 2021 | 464 | Grandma's apple cake                                              | Yes | Kosher salt |
| Taste of Home          | August/September 2021 | 489 | Brown sugar bacon BLT sandwiches                                  | Yes | Kosher salt |
| Taste of Home          | October/November 2021 | 502 | Pumpkin chocolate tart with cinnamon whipped cream                | Yes | Kosher salt |
| Taste of Home          | October/November 2021 | 504 | Simple roast brussels sprouts                                     | Yes | Kosher salt |
| Better Homes & Gardens | March 2021            | 4   | Black & white cookies                                             | Yes | Kosher salt |
| Better Homes & Gardens | March 2021            | 6   | Bittersweet chocolate cake                                        | Yes | Kosher salt |
| Better Homes & Gardens | March 2021            | 8   | English lemon posset                                              | Yes | Kosher salt |
| Better Homes & Gardens | April 2021            | 40  | Tomate-caper sauce: Sicilian cod with tomato-caper sauce          | Yes | Kosher salt |
| Better Homes & Gardens | May 2021              | 51  | Hatch chile mac 'n' cheese                                        | Yes | Kosher salt |
| Better Homes & Gardens | August 2021           | 91  | Grandma-style pizza with capocollo & fennel: homemade pizza dough | Yes | Kosher salt |
| Better Homes & Gardens | September 2021        | 122 | Jammy oat squares                                                 | Yes | Kosher salt |
| Better Homes & Gardens | September 2021        | 123 | Chewy granola bites                                               | Yes | Kosher salt |
| Better Homes & Gardens | October 2020          | 527 | Oven beef & barley stew                                           | Yes | Kosher salt |
| Better Homes & Gardens | November 2020         | 537 | Twice-toasted farro & mushroom dressing                           | Yes | Kosher salt |
| Better Homes & Gardens | November 2020         | 554 | Roasted squash                                                    | Yes | Kosher salt |
| Better Homes & Gardens | November 2020         | 555 | Roasted squash: Macadamia nut gremolata                           | Yes | Kosher salt |
| Better Homes & Gardens | November 2020         | 558 | Honeyed apricot-lime vinaigrette                                  | Yes | Kosher salt |
| Better Homes & Gardens | November 2020         | 560 | Master the mash: Celery root puree                                | Yes | Kosher salt |
| Better Homes & Gardens | November 2020         | 561 | Master the mash: Mashed cauliflower                               | Yes | Kosher salt |

|                        |                            |     |                                                     |     |                                |
|------------------------|----------------------------|-----|-----------------------------------------------------|-----|--------------------------------|
| Better Homes & Gardens | December 2020              | 565 | Jerk chicken                                        | Yes | Kosher salt                    |
| Better Homes & Gardens | February 2021              |     | Pesto pasta with charred radicchio: any herb pesto  | Yes | Kosher salt                    |
| Better Homes & Gardens | February 2021              |     | Roasted garlic-goat cheese pizza: basil vinaigrette | Yes | Kosher salt                    |
| Good Housekeeping      | July/August 2021           | 820 | Herby potato salad                                  | Yes | Kosher salt and flaky sea salt |
| Good Housekeeping      | July/August 2021           | 821 | Watermelon salad                                    | Yes | Kosher salt and flaky sea salt |
| Good Housekeeping      | December 2020              | 884 | Celebration chocolate-walnut cookies                | Yes | Kosher salt and flaky sea salt |
| AARP                   | December 2019/January 2020 | 941 | Meat loaf remix: Texas BBQ                          | No  | Not applicable                 |
| AARP                   | December 2019/January 2020 | 942 | Meat loaf remix: Wisconsin cheddar                  | No  | Not applicable                 |
| AARP                   | December 2019/January 2020 | 943 | Meat loaf remix: California vegan                   | No  | Not applicable                 |
| AARP                   | December 2019/January 2020 | 944 | Meat loaf remix: Korean spicy                       | No  | Not applicable                 |
| AARP                   | December 2019/January 2020 | 945 | Meat loaf remix: South African bobotie              | No  | Not applicable                 |
| AARP                   | December 2019/January 2020 | 946 | Meat loaf remix: Greek lamb                         | No  | Not applicable                 |
| AARP                   | October/November 2020      | 931 | The ultimate immunity smoothie                      | No  | Not applicable                 |
| AARP                   | April/May 2021             | 919 | 12 new uses for strawberries: rice pilaf            | No  | Not applicable                 |
| AARP                   | April/May 2021             | 920 | 12 new uses for strawberries: pancakes              | No  | Not applicable                 |
| AARP                   | April/May 2021             | 921 | 12 new uses for strawberries: ice cubes             | No  | Not applicable                 |
| AARP                   | April/May 2021             | 922 | 12 new uses for strawberries: tasty spread          | No  | Not applicable                 |
| AARP                   | April/May 2021             | 923 | 12 new uses for strawberries: frozen yogurt         | No  | Not applicable                 |
| AARP                   | April/May 2021             | 924 | 12 new uses for strawberries: salsa                 | No  | Not applicable                 |

|              |                            |     |                                                                                     |    |                |
|--------------|----------------------------|-----|-------------------------------------------------------------------------------------|----|----------------|
| AARP         | April/May 2021             | 925 | 12 new uses for strawberries: lemonade                                              | No | Not applicable |
| AARP         | April/May 2021             | 927 | 12 new uses for strawberries: pastry                                                | No | Not applicable |
| AARP         | April/May 2021             | 928 | 12 new uses for strawberries: salad                                                 | No | Not applicable |
| AARP         | April/May 2021             | 930 | 12 new uses for strawberries: dessert bites                                         | No | Not applicable |
| AARP         | June/July 2021             | 933 | Grill and chill: grilled tofu                                                       | No | Not applicable |
| AARP         | June/July 2021             | 934 | Grill and chill: drunken chicken                                                    | No | Not applicable |
| AARP         | June/July 2021             | 935 | Grill and chill: a mountain of burgers                                              | No | Not applicable |
| AARP         | June/July 2021             | 936 | Grill and chill: pork shoulder                                                      | No | Not applicable |
| AARP         | August/September 2021      | 947 | 6 delicious uses for a muffin tin: frittatas                                        | No | Not applicable |
| AARP         | August/September 2021      | 948 | 6 delicious uses for a muffin tin: fruit pies                                       | No | Not applicable |
| AARP         | August/September 2021      | 949 | 6 delicious uses for a muffin tin: potato gratin                                    | No | Not applicable |
| AARP         | August/September 2021      | 950 | 6 delicious uses for a muffin tin: taco-salad cups                                  | No | Not applicable |
| AARP         | August/September 2021      | 951 | 6 delicious uses for a muffin tin: mini pizzas                                      | No | Not applicable |
| AARP         | August/September 2021      | 952 | 6 delicious uses for a muffin tin: mini meat loaves                                 | No | Not applicable |
| Cosmopolitan | May/June 2021              | 955 | Choose your own egg adventure: egg drop soup                                        | No | Not applicable |
| Cosmopolitan | May/June 2021              | 956 | Choose your own egg adventure: lowkey shakshuka                                     | No | Not applicable |
| Cosmopolitan | May/June 2021              | 958 | Choose your own egg adventure: a frittata!                                          | No | Not applicable |
| Cosmopolitan | July/August 2021           | 960 | This DIY vegan ice cream tastes like a million bucks                                | No | Not applicable |
| Cosmopolitan | December 2020/January 2021 | 962 | These v unclassy desserts make total sense right now: peppermint bark hot chocolate | No | Not applicable |



|              |                               |     |                                                                                                                          |    |                |
|--------------|-------------------------------|-----|--------------------------------------------------------------------------------------------------------------------------|----|----------------|
| Cosmopolitan | December<br>2020/January 2021 | 963 | These v unclassy desserts<br>make total sense right<br>now: peppermint-and-<br>candy-cane-dipped oreos                   | No | Not applicable |
| Cosmopolitan | December<br>2020/January 2021 | 964 | These v unclassy desserts<br>make total sense right<br>now: mischief munch                                               | No | Not applicable |
| Cosmopolitan | September 2021                | 965 | Homemade dipped cones<br>are your love language<br>now                                                                   | No | Not applicable |
| Cosmopolitan | September 2021                | 967 | The fluffiest pancakes of<br>your freakin' life                                                                          | No | Not applicable |
| Cosmopolitan | October 2021                  | 971 | Watch me turn frozen<br>chicken nuggets into<br>fancy apps that'll impress<br>your friends: teeny<br>chicken and waffles | No | Not applicable |
| Cosmopolitan | October 2021                  | 972 | Watch me turn frozen<br>chicken nuggets into<br>fancy apps that'll impress<br>your friends: BB chicken<br>sammies        | No | Not applicable |
| Cosmopolitan | October 2021                  | 973 | Watch me turn frozen<br>chicken nuggets into<br>fancy apps that'll impress<br>your friends: lil chicken<br>parm bites    | No | Not applicable |
| Cosmopolitan | October 2020                  | 976 | If you're not putting<br>Halloween candy in your<br>brownies, WTD?!                                                      | No | Not applicable |
| Cosmopolitan | November 2020                 | 982 | Breakfast tacos: the<br>laziest healthy meal that<br>doesn't tase like dirt: got<br>avocados?                            | No | Not applicable |
| Cosmopolitan | November 2020                 | 983 | Breakfast tacos: the<br>laziest healthy meal that<br>doesn't tase like dirt: got<br>beans                                | No | Not applicable |
| Cosmopolitan | November 2020                 | 984 | Breakfast tacos: the<br>laziest healthy meal that<br>doesn't tase like dirt: got<br>frozen tots?                         | No | Not applicable |

|                   |                  |     |                                                                                                                                 |                |                |
|-------------------|------------------|-----|---------------------------------------------------------------------------------------------------------------------------------|----------------|----------------|
| Cosmopolitan      | March 2021       | 986 | Just a list of ways to go from *not* having a stupidly good St. Pat's Day shake to *having* a stupidly good St. Pat's Day shake | No             | Not applicable |
| Cosmopolitan      | June 2020        | 989 | DIY dipping sauces that make veggies taste like takeout: vegan buffalo sauce                                                    | No             | Not applicable |
| Cosmopolitan      | April 2021       |     | No recipes in issue                                                                                                             | Not applicable | Not applicable |
| Cosmopolitan      | July/August 2020 |     | No recipes in issue                                                                                                             | Not applicable | Not applicable |
| Good Housekeeping | September 2021   | 654 | Spicy shrimp lettuce wraps                                                                                                      | No             | Not applicable |
| Good Housekeeping | September 2021   | 660 | Pea and leek pasta                                                                                                              | No             | Not applicable |
| Good Housekeeping | September 2021   | 661 | Lemony couscous                                                                                                                 | No             | Not applicable |
| Good Housekeeping | September 2021   | 662 | Stewy beans & shrimp                                                                                                            | No             | Not applicable |
| Good Housekeeping | September 2021   | 663 | Garlicky beans                                                                                                                  | No             | Not applicable |
| Good Housekeeping | September 2021   | 670 | Crispy pork noodles                                                                                                             | No             | Not applicable |
| Good Housekeeping | October 2020     | 676 | "Bloody" bites cake pops                                                                                                        | No             | Not applicable |
| Good Housekeeping | October 2020     | 678 | Chocolate ghostly tarts: for filling                                                                                            | No             | Not applicable |
| Good Housekeeping | October 2020     | 679 | Chocolate ghostly tarts: for ghosts                                                                                             | No             | Not applicable |
| Good Housekeeping | October 2020     | 681 | Cider sangria                                                                                                                   | No             | Not applicable |

|                   |               |     |                                                    |    |                |
|-------------------|---------------|-----|----------------------------------------------------|----|----------------|
| Good Housekeeping | October 2020  | 683 | Caramel apple pie: for apples                      | No | Not applicable |
| Good Housekeeping | October 2020  | 689 | Seafood, chorizo & vegetable stew                  | No | Not applicable |
| Good Housekeeping | November 2020 | 715 | Fig & rosemary cranberry sauce                     | No | Not applicable |
| Good Housekeeping | November 2020 | 717 | Orange-buttermilk chess pie: candied orange slices | No | Not applicable |
| Good Housekeeping | November 2020 | 718 | Cherry-berry jumble fruit pie                      | No | Not applicable |
| Good Housekeeping | November 2020 | 723 | Decadent chocolate-espresso pie: for whipped cream | No | Not applicable |
| Good Housekeeping | November 2020 | 725 | Orecchiette with white beans and spinach           | No | Not applicable |
| Good Housekeeping | November 2020 | 728 | Tangy cranberry meatballs                          | No | Not applicable |
| Good Housekeeping | May 2021      | 735 | Beef and broccoli                                  | No | Not applicable |
| Good Housekeeping | May 2021      | 739 | Lemon bundt cake: for icing                        | No | Not applicable |
| Good Housekeeping | May 2021      | 741 | Thin mint cheesecake: for cheesecake               | No | Not applicable |
| Good Housekeeping | May 2021      | 745 | Mediterranean olive sauce                          | No | Not applicable |
| Good Housekeeping | May 2021      | 749 | Buffalo wing burger: for spicy mayo                | No | Not applicable |
| Good Housekeeping | May 2021      | 755 | Cauliflower fried rice                             | No | Not applicable |

|                   |            |     |                                  |    |                |
|-------------------|------------|-----|----------------------------------|----|----------------|
| Good Housekeeping | May 2021   | 757 | Artichokes: to steam             | No | Not applicable |
| Good Housekeeping | March 2021 | 760 | Lemony chicken & rice soup       | No | Not applicable |
| Good Housekeeping | March 2021 | 764 | Mint: lemon-mint slushie         | No | Not applicable |
| Good Housekeeping | March 2021 | 768 | Chocolate hazelnut cheesecake    | No | Not applicable |
| Good Housekeeping | March 2021 | 770 | Pecan sticky buns                | No | Not applicable |
| Good Housekeeping | March 2021 | 775 | Vegetarian fried rice            | No | Not applicable |
| Good Housekeeping | March 2021 | 778 | Spice-grilled steak salad        | No | Not applicable |
| Good Housekeeping | March 2021 | 779 | Shrimp soba salad                | No | Not applicable |
| Good Housekeeping | June 2021  | 785 | Raspberry-chia jam               | No | Not applicable |
| Good Housekeeping | June 2021  | 787 | Best ever French toast           | No | Not applicable |
| Good Housekeeping | June 2021  | 788 | Roasted strawberries and brie    | No | Not applicable |
| Good Housekeeping | June 2021  | 791 | Ice cream float                  | No | Not applicable |
| Good Housekeeping | June 2021  | 799 | Lemon cacio e pepe pizza         | No | Not applicable |
| Good Housekeeping | June 2021  | 802 | Strawberries: sparkling lemonade | No | Not applicable |

|                   |                       |     |                                                |    |                |
|-------------------|-----------------------|-----|------------------------------------------------|----|----------------|
| Good Housekeeping | June 2021             | 803 | Strawberries: cheesecake ice cream             | No | Not applicable |
| Good Housekeeping | June 2021             | 809 | Orange-spiked chimichurri                      | No | Not applicable |
| Good Housekeeping | June 2021             | 810 | Marinade trio: spicy soy                       | No | Not applicable |
| Good Housekeeping | June 2021             | 811 | Marinade trio: citrus garlic                   | No | Not applicable |
| Good Housekeeping | June 2021             | 812 | Marinade trio: balsamic rosemary               | No | Not applicable |
| Good Housekeeping | July/August 2021      | 816 | Agua fresca                                    | No | Not applicable |
| Good Housekeeping | July/August 2021      | 817 | Pineapple-cucumber smoothie                    | No | Not applicable |
| Good Housekeeping | July/August 2021      | 818 | Peach-mango smoothie                           | No | Not applicable |
| Good Housekeeping | July/August 2021      | 819 | Green slaw                                     | No | Not applicable |
| Good Housekeeping | July/August 2021      | 824 | Corn: quick chowder                            | No | Not applicable |
| Good Housekeeping | July/August 2021      | 827 | Cherry cocktail syrup                          | No | Not applicable |
| Good Housekeeping | January/February 2021 |     | Chocolate heart cake: frosting and decorations | No | Not applicable |
| Good Housekeeping | January/February 2021 | 853 | Easy maple horchata                            | No | Not applicable |
| Good Housekeeping | December 2020         | 869 | Coco razz smoothie                             | No | Not applicable |

|                   |               |     |                                             |    |                |
|-------------------|---------------|-----|---------------------------------------------|----|----------------|
| Good Housekeeping | December 2020 | 873 | Eggnog truffles                             | No | Not applicable |
| Good Housekeeping | December 2020 | 874 | Ham & spinach pizza                         | No | Not applicable |
| Good Housekeeping | December 2020 | 880 | Mary Pickford                               | No | Not applicable |
| Good Housekeeping | December 2020 | 883 | Cranberry swirl cheesecake bars             | No | Not applicable |
| Good Housekeeping | April 2021    | 887 | Carrot-pineapple cupcakes: for frosting     | No | Not applicable |
| Good Housekeeping | April 2021    | 888 | Pineapple flowers                           | No | Not applicable |
| Good Housekeeping | April 2021    | 898 | Elderflower gin spritz                      | No | Not applicable |
| Good Housekeeping | April 2021    | 901 | Easter cookies & cream mini cheesecakes     | No | Not applicable |
| Good Housekeeping | April 2021    | 903 | Sugared lavender cupcakes: for glaze        | No | Not applicable |
| Good Housekeeping | April 2021    | 904 | Sugared lavender cupcakes: sugared lavender | No | Not applicable |
| Good Housekeeping | April 2021    | 909 | Scallions: creamy rice                      | No | Not applicable |
| Good Housekeeping | December 2020 |     | Butternut squash + mushroom enchiladas      | No | Not applicable |
| Good Housekeeping | October 2020  |     | Chocolate ghostly tarts: for shells         | No | Not applicable |
| Good Housekeeping | October 2020  |     | Witches' brew                               | No | Not applicable |

|                   |                   |      |                                      |                |                |
|-------------------|-------------------|------|--------------------------------------|----------------|----------------|
| Good Housekeeping | July/August 2020  |      | Sweet + tart side                    | No             | Not applicable |
| Good Housekeeping | July/August 2020  |      | Smoky dessert                        | No             | Not applicable |
| People            | 6 September 2021  | 634  | Papaya salad with shrimp             | No             | Not applicable |
| People            | 23 August 2021    | 645  | Coconut & berry skillet French toast | No             | Not applicable |
| People            | 9 August 2021     | 650  | Beef bulgogi lettuce wraps           | No             | Not applicable |
| US Weekly         | 30 August 2021    | 994  | Cauliflower buffalo wings            | No             | Not applicable |
| US Weekly         | 2 August 2021     | 1005 | Busy's bloody Mary                   | No             | Not applicable |
| US Weekly         | 2 August 2021     | 1006 | Italian getaway                      | No             | Not applicable |
| US Weekly         | 1 November 2021   |      | No recipes in issue                  | Not applicable | Not applicable |
| US Weekly         | 4 October 2021    |      | No recipes in issue                  | Not applicable | Not applicable |
| US Weekly         | 27 September 2021 |      | No recipes in issue                  | Not applicable | Not applicable |
| US Weekly         | 20 September 2021 |      | No recipes in issue                  | Not applicable | Not applicable |
| US Weekly         | 13 September 2021 |      | No recipes in issue                  | Not applicable | Not applicable |
| US Weekly         | 6 September 2021  |      | No recipes in issue                  | Not applicable | Not applicable |
| US Weekly         | 16 August 2021    |      | No recipes in issue                  | Not applicable | Not applicable |
| US Weekly         | 26 July 2021      |      | No recipes in issue                  | Not applicable | Not applicable |
| US Weekly         | 19 July 2021      |      | No recipes in issue                  | Not applicable | Not applicable |
| US Weekly         | 12 July 2021      |      | No recipes in issue                  | Not applicable | Not applicable |
| US Weekly         | 21 June 2021      |      | No recipes in issue                  | Not applicable | Not applicable |
| US Weekly         | 14 June 2021      |      | No recipes in issue                  | Not applicable | Not applicable |
| US Weekly         | 7 June 2021       |      | No recipes in issue                  | Not applicable | Not applicable |
| US Weekly         | 9 August 2021     | 1003 | Ham & cheese quesadilla              | No             | Not applicable |

|               |                       |     |                                 |                |                |
|---------------|-----------------------|-----|---------------------------------|----------------|----------------|
| US Weekly     | 23 August 2021        |     | Funfetti flan cake              | No             | Not applicable |
| US Weekly     | 5 July 2021           |     | No recipes in issue             | Not applicable | Not applicable |
| Vanity Fair   | November 2021         |     | No recipes in issue             | Not applicable | Not applicable |
| Vanity Fair   | October 2021          |     | No recipes in issue             | Not applicable | Not applicable |
| Vanity Fair   | September 2021        |     | No recipes in issue             | Not applicable | Not applicable |
| Vanity Fair   | July/August 2021      |     | No recipes in issue             | Not applicable | Not applicable |
| Vanity Fair   | June 2021             |     | No recipes in issue             | Not applicable | Not applicable |
| Vanity Fair   | May 2021              |     | No recipes in issue             | Not applicable | Not applicable |
| Vanity Fair   | April 2021            |     | No recipes in issue             | Not applicable | Not applicable |
| Vanity Fair   | Hollywood 2021        |     | No recipes in issue             | Not applicable | Not applicable |
| Vanity Fair   | March 2021            |     | No recipes in issue             | Not applicable | Not applicable |
| Vanity Fair   | Holiday 2020/2021     |     | No recipes in issue             | Not applicable | Not applicable |
| Vanity Fair   | December 2020         |     | No recipes in issue             | Not applicable | Not applicable |
| Vanity Fair   | October 2020          |     | No recipes in issue             | Not applicable | Not applicable |
| Vanity Fair   | November 2020         |     | No recipes in issue             | Not applicable | Not applicable |
| Taste of Home | August/September 2020 | 126 | Bacon-chicken club pizza        | No             | Not applicable |
| Taste of Home | August/September 2020 | 128 | Swiss chicken sliders           | No             | Not applicable |
| Taste of Home | August/September 2020 | 130 | Slow-cooker meatball sandwiches | No             | Not applicable |
| Taste of Home | August/September 2020 | 131 | Tangy sweet-and-sour meatballs  | No             | Not applicable |
| Taste of Home | August/September 2020 | 134 | Weeknight goulash               | No             | Not applicable |
| Taste of Home | August/September 2020 | 137 | Flourless chocolate torte       | No             | Not applicable |
| Taste of Home | August/September 2020 | 138 | Easy white chicken chili        | No             | Not applicable |



|               |                       |     |                                         |    |                |
|---------------|-----------------------|-----|-----------------------------------------|----|----------------|
| Taste of Home | August/September 2020 | 139 | Pineapple shrimp fried rice             | No | Not applicable |
| Taste of Home | August/September 2020 | 141 | Apricot-ginger acorn squash             | No | Not applicable |
| Taste of Home | August/September 2020 | 147 | Cinnamon apple cider monkey bread       | No | Not applicable |
| Taste of Home | August/September 2020 | 154 | Nacho pie                               | No | Not applicable |
| Taste of Home | August/September 2020 | 159 | Habanero strawberry jam                 | No | Not applicable |
| Taste of Home | August/September 2020 | 161 | One-pan sweet chili shrimp & veggies    | No | Not applicable |
| Taste of Home | August/September 2020 | 163 | One-pot red beans & rice                | No | Not applicable |
| Taste of Home | August/September 2020 | 165 | Easy chicken pesto stuffed peppers      | No | Not applicable |
| Taste of Home | August/September 2020 | 167 | Fruit smoothie bowls                    | No | Not applicable |
| Taste of Home | August/September 2020 | 168 | Coconut cold brew latte                 | No | Not applicable |
| Taste of Home | August/September 2020 | 169 | Cheesy roast beef pinwheels             | No | Not applicable |
| Taste of Home | October/November 2020 | 171 | Angel hair pasta with spinach & spinach | No | Not applicable |
| Taste of Home | October/November 2020 | 172 | Chicken biscuit skillet                 | No | Not applicable |
| Taste of Home | October/November 2020 | 173 | Indian-spiced beefy lettuce wraps       | No | Not applicable |
| Taste of Home | October/November 2020 | 179 | Quick tomato soup                       | No | Not applicable |
| Taste of Home | October/November 2020 | 181 | Sugared cranberries                     | No | Not applicable |
| Taste of Home | October/November 2020 | 184 | Traditional holiday stuffing            | No | Not applicable |
| Taste of Home | October/November 2020 | 185 | Corn pudding                            | No | Not applicable |
| Taste of Home | October/November 2020 | 186 | Hot spiced cranberry drink              | No | Not applicable |
| Taste of Home | October/November 2020 | 191 | Mashed cauliflower with parmesan        | No | Not applicable |
| Taste of Home | October/November 2020 | 198 | Ready, set...roll!: buffalo             | No | Not applicable |

|               |                       |     |                                     |    |                |
|---------------|-----------------------|-----|-------------------------------------|----|----------------|
| Taste of Home | October/November 2020 | 199 | Ready, set...roll!: nacho           | No | Not applicable |
| Taste of Home | October/November 2020 | 200 | Ready, set...roll!: pesto           | No | Not applicable |
| Taste of Home | October/November 2020 | 201 | Ready, set...roll!: reuben          | No | Not applicable |
| Taste of Home | October/November 2020 | 202 | Ready, set...roll!: feta & oliva    | No | Not applicable |
| Taste of Home | October/November 2020 | 203 | Ready, set...roll!: curried-apricot | No | Not applicable |
| Taste of Home | October/November 2020 | 204 | Ready, set...roll!: smoked salmon   | No | Not applicable |
| Taste of Home | October/November 2020 | 205 | Ready, set...roll!: chicken noodle  | No | Not applicable |
| Taste of Home | October/November 2020 | 206 | Ready, set...roll!: pepperoni pizza | No | Not applicable |
| Taste of Home | October/November 2020 | 207 | Ready, set...roll!: blue cheese     | No | Not applicable |
| Taste of Home | October/November 2020 | 208 | The best quiche Lorraine            | No | Not applicable |
| Taste of Home | October/November 2020 | 217 | Lake Charles dip                    | No | Not applicable |
| Taste of Home | October/November 2020 | 218 | Cranberry cherry punch              | No | Not applicable |
| Taste of Home | October/November 2020 | 220 | Chocolate caramel cookies           | No | Not applicable |
| Taste of Home | October/November 2020 | 222 | Fried banana milkshakes             | No | Not applicable |
| Taste of Home | December/January 2021 | 223 | Warm grapefruit with ginger sugar   | No | Not applicable |
| Taste of Home | December/January 2021 | 224 | Madras curried eggs with rice       | No | Not applicable |
| Taste of Home | December/January 2021 | 225 | Quick & easy chicken poke bowl      | No | Not applicable |
| Taste of Home | December/January 2021 | 227 | Sausage & pancake bake              | No | Not applicable |
| Taste of Home | December/January 2021 | 231 | Haute chocolate: biscoff            | No | Not applicable |
| Taste of Home | December/January 2021 | 232 | Haute chocolate: chai               | No | Not applicable |
| Taste of Home | December/January 2021 | 233 | Haute chocolate: chili-orange       | No | Not applicable |

|               |                       |     |                                             |    |                |
|---------------|-----------------------|-----|---------------------------------------------|----|----------------|
| Taste of Home | December/January 2021 | 234 | Haute chocolate: creamy white               | No | Not applicable |
| Taste of Home | December/January 2021 | 235 | Haute chocolate: hazelnut mocha             | No | Not applicable |
| Taste of Home | December/January 2021 | 236 | Haute chocolate: heavenly nutmeg            | No | Not applicable |
| Taste of Home | December/January 2021 | 237 | Haute chocolate: peppermint red velvet      | No | Not applicable |
| Taste of Home | December/January 2021 | 238 | Haute chocolate: pumpkin spice              | No | Not applicable |
| Taste of Home | December/January 2021 | 239 | Haute chocolate: salted caramel & banana    | No | Not applicable |
| Taste of Home | December/January 2021 | 240 | Haute chocolate: snickerdoodle              | No | Not applicable |
| Taste of Home | December/January 2021 | 242 | Crispy Christmas trees                      | No | Not applicable |
| Taste of Home | December/January 2021 | 243 | Goody-goody gumdrops                        | No | Not applicable |
| Taste of Home | December/January 2021 | 244 | Mulled wine margaritas                      | No | Not applicable |
| Taste of Home | December/January 2021 | 245 | Eggnog tres leches cake                     | No | Not applicable |
| Taste of Home | December/January 2021 | 246 | Caramel heavenlies                          | No | Not applicable |
| Taste of Home | December/January 2021 | 248 | Peppermint cheesecake on a stick            | No | Not applicable |
| Taste of Home | December/January 2021 | 252 | Brie cherry pastry cups                     | No | Not applicable |
| Taste of Home | December/January 2021 | 253 | Spiral ham with cranberry glaze             | No | Not applicable |
| Taste of Home | December/January 2021 | 256 | Peanut butter cinnamon snap cookies         | No | Not applicable |
| Taste of Home | December/January 2021 | 259 | Rolled butter almond cookies                | No | Not applicable |
| Taste of Home | December/January 2021 | 262 | Two-tone caramel brownies                   | No | Not applicable |
| Taste of Home | December/January 2021 | 264 | Pumpkin French toast with bacon maple syrup | No | Not applicable |
| Taste of Home | December/January 2021 | 266 | Holiday pretzel salad                       | No | Not applicable |
| Taste of Home | December/January 2021 | 267 | Hot shrimp dip                              | No | Not applicable |

|               |                       |     |                                            |    |                |
|---------------|-----------------------|-----|--------------------------------------------|----|----------------|
| Taste of Home | December/January 2021 | 270 | Minty cookies & cream chocolate fudge      | No | Not applicable |
| Taste of Home | December/January 2021 | 273 | Hawaiian egg rolls                         | No | Not applicable |
| Taste of Home | December/January 2021 | 274 | Easy coconut shrimp                        | No | Not applicable |
| Taste of Home | December/January 2021 | 275 | Nutty Hawaiian                             | No | Not applicable |
| Taste of Home | December/January 2021 | 276 | Peppermint popcorn                         | No | Not applicable |
| Taste of Home | February/March 2021   | 279 | Banana fudge pie                           | No | Not applicable |
| Taste of Home | February/March 2021   | 281 | Ramen noodle stir-fry                      | No | Not applicable |
| Taste of Home | February/March 2021   | 283 | Tex-Mex grain bowl                         | No | Not applicable |
| Taste of Home | February/March 2021   | 285 | Poppy seed chicken                         | No | Not applicable |
| Taste of Home | February/March 2021   | 290 | Salted peanut squares                      | No | Not applicable |
| Taste of Home | February/March 2021   | 291 | Triple berry mini pies                     | No | Not applicable |
| Taste of Home | February/March 2021   | 292 | Red velvet cake in a jar                   | No | Not applicable |
| Taste of Home | February/March 2021   | 294 | Rose water rice pudding                    | No | Not applicable |
| Taste of Home | February/March 2021   | 295 | Lebanese stuffed cabbages                  | No | Not applicable |
| Taste of Home | February/March 2021   | 297 | Guacamole: radish + mandarin orange        | No | Not applicable |
| Taste of Home | February/March 2021   | 298 | Guacamole: grilled chicken + cherry tomato | No | Not applicable |
| Taste of Home | February/March 2021   | 299 | Guacamole: basil + toasted pine nuts       | No | Not applicable |
| Taste of Home | February/March 2021   | 300 | Guacamole: cajun shrimp + red pepper       | No | Not applicable |
| Taste of Home | February/March 2021   | 301 | Guacamole: mango + habanero                | No | Not applicable |
| Taste of Home | February/March 2021   | 302 | Guacamole: black bean + corn               | No | Not applicable |
| Taste of Home | February/March 2021   | 303 | Guacamole: blue cheese + toasted almonds   | No | Not applicable |

|               |                     |     |                                                 |    |                |
|---------------|---------------------|-----|-------------------------------------------------|----|----------------|
| Taste of Home | February/March 2021 | 304 | Guacamole: jicama + pineapple                   | No | Not applicable |
| Taste of Home | February/March 2021 | 305 | Guacamole: bacon + cotija cheese                | No | Not applicable |
| Taste of Home | February/March 2021 | 306 | Guacamole: apple + white onion                  | No | Not applicable |
| Taste of Home | February/March 2021 | 307 | Pepper jelly hogs in a blanket                  | No | Not applicable |
| Taste of Home | February/March 2021 | 309 | Peanut butter & jelly cheesecake                | No | Not applicable |
| Taste of Home | February/March 2021 | 313 | Waffle-iron pizzas                              | No | Not applicable |
| Taste of Home | February/March 2021 | 317 | Parisian sipping chocolate                      | No | Not applicable |
| Taste of Home | February/March 2021 | 323 | Slow-cooker baked potatoes                      | No | Not applicable |
| Taste of Home | February/March 2021 | 325 | Hot chili cheese dip                            | No | Not applicable |
| Taste of Home | February/March 2021 | 327 | Chive butter balls                              | No | Not applicable |
| Taste of Home | April/May 2021      | 331 | Lemon, ginger & turmeric infused water          | No | Not applicable |
| Taste of Home | April/May 2021      | 332 | Crumb-topped sole                               | No | Not applicable |
| Taste of Home | April/May 2021      | 333 | Salmon croquette breakfast sandwich             | No | Not applicable |
| Taste of Home | April/May 2021      | 337 | Alfredo sauce: Fettucine alfredo                | No | Not applicable |
| Taste of Home | April/May 2021      | 338 | Alfredo sauce: Seafood alfredo                  | No | Not applicable |
| Taste of Home | April/May 2021      | 342 | Homemade marinara sauce: Spicy bratwurst supper | No | Not applicable |
| Taste of Home | April/May 2021      | 344 | Classic pesto: Easy pesto pizza                 | No | Not applicable |
| Taste of Home | April/May 2021      | 353 | Sweet tea concentrate                           | No | Not applicable |
| Taste of Home | April/May 2021      | 354 | Quick ambrosia fruit salad                      | No | Not applicable |
| Taste of Home | April/May 2021      | 355 | Butter pecan cheesecake                         | No | Not applicable |
| Taste of Home | April/May 2021      | 356 | Sunny citrus layered cheesecake                 | No | Not applicable |

|               |                |     |                                           |    |                |
|---------------|----------------|-----|-------------------------------------------|----|----------------|
| Taste of Home | April/May 2021 | 357 | Double chocolate espresso cheesecake      | No | Not applicable |
| Taste of Home | April/May 2021 | 358 | New York cheesecake with shortbread crust | No | Not applicable |
| Taste of Home | April/May 2021 | 359 | Classic margarita                         | No | Not applicable |
| Taste of Home | April/May 2021 | 360 | Melon margarita                           | No | Not applicable |
| Taste of Home | April/May 2021 | 361 | Caribbean margarita                       | No | Not applicable |
| Taste of Home | April/May 2021 | 362 | Amaretto margarita                        | No | Not applicable |
| Taste of Home | April/May 2021 | 363 | Grapefruit sunset margarita               | No | Not applicable |
| Taste of Home | April/May 2021 | 364 | Blueberry-mint frozen margarita           | No | Not applicable |
| Taste of Home | April/May 2021 | 365 | Raspberry-ginger frozen margarita         | No | Not applicable |
| Taste of Home | April/May 2021 | 366 | Frozen coconut margarita                  | No | Not applicable |
| Taste of Home | April/May 2021 | 367 | Strawberry-basil frozen margarita         | No | Not applicable |
| Taste of Home | April/May 2021 | 368 | Sriracha-mango frozen margarita           | No | Not applicable |
| Taste of Home | April/May 2021 | 371 | Candy bar fudge                           | No | Not applicable |
| Taste of Home | April/May 2021 | 373 | Sheet-pan jambalaya with cauliflower rice | No | Not applicable |
| Taste of Home | April/May 2021 | 374 | Breakfast BLT waffles                     | No | Not applicable |
| Taste of Home | April/May 2021 | 376 | Strawberry overnight oats                 | No | Not applicable |
| Taste of Home | April/May 2021 | 378 | Mean green smoothie bowls                 | No | Not applicable |
| Taste of Home | April/May 2021 | 382 | Pear quinoa breakfast bake                | No | Not applicable |
| Taste of Home | April/May 2021 | 383 | Yoda soda                                 | No | Not applicable |
| Taste of Home | April/May 2021 | 384 | Robot cake                                | No | Not applicable |
| Taste of Home | April/May 2021 | 386 | Lightsaber pretzels                       | No | Not applicable |

|               |                |     |                                                                        |    |                |
|---------------|----------------|-----|------------------------------------------------------------------------|----|----------------|
| Taste of Home | April/May 2021 | 387 | Passion fruit mojito                                                   | No | Not applicable |
| Taste of Home | June/July 2021 | 389 | Five-minute blueberry pie                                              | No | Not applicable |
| Taste of Home | June/July 2021 | 392 | Chicken strawberry spinach salad                                       | No | Not applicable |
| Taste of Home | June/July 2021 | 394 | Dad's lemony grilled chicken: Cheesy chicken quesadilla                | No | Not applicable |
| Taste of Home | June/July 2021 | 395 | Dad's lemony grilled chicken: Chicken fried rice                       | No | Not applicable |
| Taste of Home | June/July 2021 | 396 | Dad's lemony grilled chicken: Buffalo chicken baked potato             | No | Not applicable |
| Taste of Home | June/July 2021 | 397 | Easy marinated grilled flank steak                                     | No | Not applicable |
| Taste of Home | June/July 2021 | 398 | Easy marinated grilled flank steak: Grilled flank steak salad          | No | Not applicable |
| Taste of Home | June/July 2021 | 399 | Easy marinated grilled flank steak: Philly cheesesteak sandwiches      | No | Not applicable |
| Taste of Home | June/July 2021 | 400 | Easy marinated grilled flank steak: Grilled steak tacos                | No | Not applicable |
| Taste of Home | June/July 2021 | 402 | Skewered lamb with blackberry-balsamic glaze: Greek mac & cheese       | No | Not applicable |
| Taste of Home | June/July 2021 | 403 | Skewered lamb with blackberry-balsamic glaze: Mediterranean grain bowl | No | Not applicable |
| Taste of Home | June/July 2021 | 404 | Skewered lamb with blackberry-balsamic glaze: Lemony lamb fettucine    | No | Not applicable |
| Taste of Home | June/July 2021 | 414 | Tajin limeade                                                          | No | Not applicable |
| Taste of Home | June/July 2021 | 416 | Hearty chicken enchiladas                                              | No | Not applicable |
| Taste of Home | June/July 2021 | 418 | Peanut butter silk pie                                                 | No | Not applicable |

|               |                |     |                                             |    |                |
|---------------|----------------|-----|---------------------------------------------|----|----------------|
| Taste of Home | June/July 2021 | 419 | Berry pretzel fluff dessert                 | No | Not applicable |
| Taste of Home | June/July 2021 | 420 | Peach Bavarian                              | No | Not applicable |
| Taste of Home | June/July 2021 | 421 | Rainbow sherbet angel food cake             | No | Not applicable |
| Taste of Home | June/July 2021 | 422 | Grecian macaroni salad                      | No | Not applicable |
| Taste of Home | June/July 2021 | 423 | Scandinavian macaroni salad                 | No | Not applicable |
| Taste of Home | June/July 2021 | 424 | Caprese macaroni salad                      | No | Not applicable |
| Taste of Home | June/July 2021 | 425 | Middle Eastern macaroni salad               | No | Not applicable |
| Taste of Home | June/July 2021 | 426 | Chicken caesar macaroni salad               | No | Not applicable |
| Taste of Home | June/July 2021 | 427 | Polynesian macaroni salad                   | No | Not applicable |
| Taste of Home | June/July 2021 | 428 | Cubano macaroni salad                       | No | Not applicable |
| Taste of Home | June/July 2021 | 429 | Chicken taco macaroni salad                 | No | Not applicable |
| Taste of Home | June/July 2021 | 430 | Barbecue macaroni salad                     | No | Not applicable |
| Taste of Home | June/July 2021 | 431 | Shrimp & crab macaroni salad                | No | Not applicable |
| Taste of Home | June/July 2021 | 440 | Roasted grape & sweet cheese phyllo galette | No | Not applicable |
| Taste of Home | June/July 2021 | 442 | Citrus cantaloupe butter                    | No | Not applicable |
| Taste of Home | June/July 2021 | 443 | Peaches & cream whiskey loaf                | No | Not applicable |
| Taste of Home | June/July 2021 | 444 | Grilled elote flatbread                     | No | Not applicable |
| Taste of Home | June/July 2021 | 448 | Spicy Thai noodle watermelon salad          | No | Not applicable |
| Taste of Home | June/July 2021 | 449 | Creamy corn custards                        | No | Not applicable |
| Taste of Home | June/July 2021 | 451 | Cheese & pimiento spread                    | No | Not applicable |
| Taste of Home | June/July 2021 | 452 | Favorite hot chocolate                      | No | Not applicable |



|               |                       |     |                                    |    |                |
|---------------|-----------------------|-----|------------------------------------|----|----------------|
| Taste of Home | June/July 2021        | 454 | Lemon-apricot fruit pops           | No | Not applicable |
| Taste of Home | August/September 2021 | 456 | That's a wrap!                     | No | Not applicable |
| Taste of Home | August/September 2021 | 457 | Blackberry shrub                   | No | Not applicable |
| Taste of Home | August/September 2021 | 458 | Tarragon tuna salad                | No | Not applicable |
| Taste of Home | August/September 2021 | 460 | Shrimp tostadas with avocado salsa | No | Not applicable |
| Taste of Home | August/September 2021 | 469 | Spaghetti with bacon               | No | Not applicable |
| Taste of Home | August/September 2021 | 470 | Crunchy burger quesadillas         | No | Not applicable |
| Taste of Home | August/September 2021 | 472 | Bacon breakfast cookies            | No | Not applicable |
| Taste of Home | August/September 2021 | 479 | Stir-fry scallops                  | No | Not applicable |
| Taste of Home | August/September 2021 | 481 | Grilled pimiento cheese sandwiches | No | Not applicable |
| Taste of Home | August/September 2021 | 483 | Hoisin chicken wraps               | No | Not applicable |
| Taste of Home | August/September 2021 | 484 | Kilbourn sandwich                  | No | Not applicable |
| Taste of Home | August/September 2021 | 487 | Hot Italian party sandwiches       | No | Not applicable |
| Taste of Home | August/September 2021 | 490 | Currywurst                         | No | Not applicable |
| Taste of Home | October/November 2021 | 494 | Piecaken                           | No | Not applicable |
| Taste of Home | October/November 2021 | 496 | Easy ground beef stroganoff        | No | Not applicable |
| Taste of Home | October/November 2021 | 498 | Quick & easy skillet lasagna       | No | Not applicable |
| Taste of Home | October/November 2021 | 500 | Breakfast wraps                    | No | Not applicable |
| Taste of Home | October/November 2021 | 503 | Maple-honey cranberry sauce        | No | Not applicable |
| Taste of Home | October/November 2021 | 508 | Cranberry apple slab pie           | No | Not applicable |
| Taste of Home | October/November 2021 | 511 | Sweet & puckery cupcakes           | No | Not applicable |

|                        |                       |     |                                                             |    |                |
|------------------------|-----------------------|-----|-------------------------------------------------------------|----|----------------|
| Taste of Home          | October/November 2021 | 512 | Peanut-cashew marshmallow pie                               | No | Not applicable |
| Taste of Home          | October/November 2021 | 513 | Make-ahead turkey gravy                                     | No | Not applicable |
| Taste of Home          | October/November 2021 | 514 | Maple miso sweet potato casserole                           | No | Not applicable |
| Taste of Home          | October/November 2021 | 519 | Cherry lemon-lime punch                                     | No | Not applicable |
| Taste of Home          | October/November 2021 | 521 | Confetti snack mix                                          | No | Not applicable |
| Taste of Home          | October/November 2021 | 522 | Turkey, gouda & apple tea sandwiches                        | No | Not applicable |
| Better Homes & Gardens | March 2021            | 1   | Matzo brei with lox and chives                              | No | Not applicable |
| Better Homes & Gardens | March 2021            | 2   | Banana rum trifle                                           | No | Not applicable |
| Better Homes & Gardens | March 2021            | 3   | Banana rum trifle: sweetened whipped cream                  | No | Not applicable |
| Better Homes & Gardens | March 2021            | 5   | Boston cream pie                                            | No | Not applicable |
| Better Homes & Gardens | March 2021            | 9   | Pot o' gold Guinness chocolate cupcakes                     | No | Not applicable |
| Better Homes & Gardens | March 2021            | 10  | Italian chicken meatballs                                   | No | Not applicable |
| Better Homes & Gardens | March 2021            | 11  | Turkey pot pies                                             | No | Not applicable |
| Better Homes & Gardens | March 2021            | 12  | Macaroni and cheese with cashew cream                       | No | Not applicable |
| Better Homes & Gardens | March 2021            | 13  | Macaroni and cheese with cashew cream: toasted bread crumbs | No | Not applicable |
| Better Homes & Gardens | March 2021            | 14  | Open-face cheesesteaks                                      | No | Not applicable |
| Better Homes & Gardens | March 2021            | 15  | Sou bourek                                                  | No | Not applicable |
| Better Homes & Gardens | March 2021            | 16  | Suugo suqaar                                                | No | Not applicable |
| Better Homes & Gardens | March 2021            | 17  | Suugo suqaar: xawaash spice mix                             | No | Not applicable |
| Better Homes & Gardens | March 2021            | 18  | Pure rhubarb crumble pie                                    | No | Not applicable |

|                        |            |    |                                                         |    |                |
|------------------------|------------|----|---------------------------------------------------------|----|----------------|
| Better Homes & Gardens | March 2021 | 19 | Pure rhubarb crumble pie: strawberry-rhubarb pie        | No | Not applicable |
| Better Homes & Gardens | March 2021 | 20 | All-buttah pie dough                                    | No | Not applicable |
| Better Homes & Gardens | March 2021 | 21 | Zarela's pineapple-ginger wings                         | No | Not applicable |
| Better Homes & Gardens | April 2021 | 22 | Stuffed French toast: nut butter and bananas            | No | Not applicable |
| Better Homes & Gardens | April 2021 | 23 | Stuffed French toast: sausage and asparagus             | No | Not applicable |
| Better Homes & Gardens | April 2021 | 24 | Steamed artichokes                                      | No | Not applicable |
| Better Homes & Gardens | April 2021 | 25 | Fresh mint, basil, and pistachio sauce                  | No | Not applicable |
| Better Homes & Gardens | April 2021 | 26 | Tarragon butter                                         | No | Not applicable |
| Better Homes & Gardens | April 2021 | 27 | Dijon dipping sauce                                     | No | Not applicable |
| Better Homes & Gardens | April 2021 | 28 | Raw artichoke salad with manchego cheese                | No | Not applicable |
| Better Homes & Gardens | April 2021 | 29 | Herb-and-pancetta-stuffed artichokes                    | No | Not applicable |
| Better Homes & Gardens | April 2021 | 30 | Grilled baby artichoke antipasto                        | No | Not applicable |
| Better Homes & Gardens | April 2021 | 31 | Orange bunny rolls                                      | No | Not applicable |
| Better Homes & Gardens | April 2021 | 32 | Lime crunch cheesecake                                  | No | Not applicable |
| Better Homes & Gardens | April 2021 | 33 | Carrot cake cream pies                                  | No | Not applicable |
| Better Homes & Gardens | April 2021 | 34 | Malted brownies                                         | No | Not applicable |
| Better Homes & Gardens | April 2021 | 35 | Malted brownies: malted milk frosting                   | No | Not applicable |
| Better Homes & Gardens | April 2021 | 36 | Verde simmer sauce                                      | No | Not applicable |
| Better Homes & Gardens | April 2021 | 37 | Verde simmer sauce: black bean skillet enchiladas verde | No | Not applicable |
| Better Homes & Gardens | April 2021 | 38 | Verde simmer sauce: chicken verde tacos                 | No | Not applicable |

|                        |            |    |                                                                       |    |                |
|------------------------|------------|----|-----------------------------------------------------------------------|----|----------------|
| Better Homes & Gardens | April 2021 | 39 | Tomato-caper sauce                                                    | No | Not applicable |
| Better Homes & Gardens | April 2021 | 41 | Tomato-caper sauce: tortellini & smoked sausage in tomato-caper sauce | No | Not applicable |
| Better Homes & Gardens | April 2021 | 42 | Coconut curry sauce                                                   | No | Not applicable |
| Better Homes & Gardens | April 2021 | 44 | Coconut curry sauce: cauliflower & chickpea coconut curry             | No | Not applicable |
| Better Homes & Gardens | May 2021   | 45 | Warm kale-and-potato chicken salad with bacon and mustard             | No | Not applicable |
| Better Homes & Gardens | May 2021   | 46 | Sesame-soy noodles with shrimp                                        | No | Not applicable |
| Better Homes & Gardens | May 2021   | 47 | Zucchini-corn soup with andouille                                     | No | Not applicable |
| Better Homes & Gardens | May 2021   | 48 | Honey-garlic grilled chicken with pickled chiles & peaches            | No | Not applicable |
| Better Homes & Gardens | May 2021   | 49 | Skirt steak with pineapple salsa                                      | No | Not applicable |
| Better Homes & Gardens | May 2021   | 50 | Caramelized green beans                                               | No | Not applicable |
| Better Homes & Gardens | May 2021   | 52 | Not your church lady's strawberry semifreddo                          | No | Not applicable |
| Better Homes & Gardens | May 2021   | 53 | Southern sweet tea                                                    | No | Not applicable |
| Better Homes & Gardens | May 2021   | 54 | Little green dress                                                    | No | Not applicable |
| Better Homes & Gardens | May 2021   | 55 | Gas station biscuits                                                  | No | Not applicable |
| Better Homes & Gardens | June 2021  | 56 | Chocolate-cherry muffins                                              | No | Not applicable |
| Better Homes & Gardens | June 2021  | 57 | Sweet and spicy mango-sauced ribs with smoky slaw                     | No | Not applicable |
| Better Homes & Gardens | June 2021  | 58 | Passion fruit shrimp & scallop skewers                                | No | Not applicable |
| Better Homes & Gardens | June 2021  | 59 | Passion fruit shrimp & scallop skewers: fresh fruit salad skewers     | No | Not applicable |

|                        |           |    |                                                          |    |                |
|------------------------|-----------|----|----------------------------------------------------------|----|----------------|
| Better Homes & Gardens | June 2021 | 60 | Grilled bananas and pineapple with coconut-caramel sauce | No | Not applicable |
| Better Homes & Gardens | June 2021 | 61 | Tamarind BBQ chicken                                     | No | Not applicable |
| Better Homes & Gardens | June 2021 | 62 | Coconut rice                                             | No | Not applicable |
| Better Homes & Gardens | June 2021 | 63 | Grapefruit-guava fruit punch                             | No | Not applicable |
| Better Homes & Gardens | June 2021 | 64 | Zucchini, summer squash & chicken salad                  | No | Not applicable |
| Better Homes & Gardens | June 2021 | 65 | Julienned snow peas, celery & radish salad               | No | Not applicable |
| Better Homes & Gardens | June 2021 | 66 | Thai-inspired beef & cucumber salad                      | No | Not applicable |
| Better Homes & Gardens | June 2021 | 67 | Shaved fennel & fingerling potato salad                  | No | Not applicable |
| Better Homes & Gardens | June 2021 | 68 | Melon, peach & prosciutto salad                          | No | Not applicable |
| Better Homes & Gardens | July 2021 | 70 | Rainbow fruit pops                                       | No | Not applicable |
| Better Homes & Gardens | July 2021 | 71 | Affogato pops                                            | No | Not applicable |
| Better Homes & Gardens | July 2021 | 72 | Chile mango pops                                         | No | Not applicable |
| Better Homes & Gardens | July 2021 | 73 | Chocolate-toffee squares                                 | No | Not applicable |
| Better Homes & Gardens | July 2021 | 75 | Berry-yogurt rocket pops                                 | No | Not applicable |
| Better Homes & Gardens | July 2021 | 76 | Strawberry coffee cake with cornmeal streusel            | No | Not applicable |
| Better Homes & Gardens | July 2021 | 77 | Fresh corn salad with stone fruit & herbs                | No | Not applicable |
| Better Homes & Gardens | July 2021 | 78 | Corn crostata with tomatillos & queso fresco             | No | Not applicable |
| Better Homes & Gardens | July 2021 | 79 | Smoky grilled corn, poblano & cheese dip                 | No | Not applicable |
| Better Homes & Gardens | July 2021 | 80 | Summer risotto with corn butter & shrimp                 | No | Not applicable |
| Better Homes & Gardens | July 2021 | 81 | Butter-braised corn on the cob                           | No | Not applicable |

|                        |             |     |                                                    |    |                |
|------------------------|-------------|-----|----------------------------------------------------|----|----------------|
| Better Homes & Gardens | July 2021   | 82  | Sweet corn panna cotta with cherry-vanilla compote | No | Not applicable |
| Better Homes & Gardens | July 2021   | 83  | Mini cupcakes                                      | No | Not applicable |
| Better Homes & Gardens | July 2021   | 85  | Sheet-pan flag nachos                              | No | Not applicable |
| Better Homes & Gardens | August 2021 | 86  | Green tea float                                    | No | Not applicable |
| Better Homes & Gardens | August 2021 | 87  | Herbed Arnold Palmer                               | No | Not applicable |
| Better Homes & Gardens | August 2021 | 88  | London Fog spritz                                  | No | Not applicable |
| Better Homes & Gardens | August 2021 | 89  | London Fog spritz: vanilla syrup                   | No | Not applicable |
| Better Homes & Gardens | August 2021 | 90  | Grandma-style pizza with capocollo & fennel        | No | Not applicable |
| Better Homes & Gardens | August 2021 | 92  | Chicken cashew nut                                 | No | Not applicable |
| Better Homes & Gardens | August 2021 | 93  | Roasted chile powder                               | No | Not applicable |
| Better Homes & Gardens | August 2021 | 94  | Luna's broccoli beef                               | No | Not applicable |
| Better Homes & Gardens | August 2021 | 95  | Sticky caramelized shrimp lettuce wraps            | No | Not applicable |
| Better Homes & Gardens | August 2021 | 96  | Easy wok-fried greens                              | No | Not applicable |
| Better Homes & Gardens | August 2021 | 97  | Pad mama                                           | No | Not applicable |
| Better Homes & Gardens | August 2021 | 98  | Chicken & waffles cobb salad                       | No | Not applicable |
| Better Homes & Gardens | August 2021 | 99  | Chicken & waffles cobb salad: maple vinaigrette    | No | Not applicable |
| Better Homes & Gardens | August 2021 | 100 | Shortcut sugar buns                                | No | Not applicable |
| Better Homes & Gardens | August 2021 | 101 | Watermelon cucumber-lime refresher                 | No | Not applicable |
| Better Homes & Gardens | August 2021 | 102 | Sparkling iced mocha                               | No | Not applicable |
| Better Homes & Gardens | August 2021 | 103 | Pineapple-mint coconut cooler                      | No | Not applicable |
| Better Homes & Gardens | August 2021 | 104 | Strawberry kombucha crush                          | No | Not applicable |

|                        |                     |     |                                                                   |    |                |
|------------------------|---------------------|-----|-------------------------------------------------------------------|----|----------------|
| Better Homes & Gardens | September 2021      | 109 | Chocolate-hazelnut & berry folded crepe                           | No | Not applicable |
| Better Homes & Gardens | September 2021      | 112 | Chicken laab cabbage rolls                                        | No | Not applicable |
| Better Homes & Gardens | September 2021      | 113 | Chicken laab cabbage rolls: spicy sesame dipping sauce            | No | Not applicable |
| Better Homes & Gardens | September 2021      | 114 | Farro salad-stuffed avocados                                      | No | Not applicable |
| Better Homes & Gardens | September 2021      | 115 | Baked stuffed tomatoes with herbs                                 | No | Not applicable |
| Better Homes & Gardens | September 2021      | 116 | Stuffed eggplant caponata                                         | No | Not applicable |
| Better Homes & Gardens | September 2021      | 117 | Poblanos with late-summer vegetables & shrimp                     | No | Not applicable |
| Better Homes & Gardens | September 2021      | 118 | Spicy buffalo-style chicken sandwiches                            | No | Not applicable |
| Better Homes & Gardens | September 2021      | 120 | Crispy dill pickled chicken sandwiches: copycat Chick-Fil-A sauce | No | Not applicable |
| Better Homes & Gardens | September 2021      | 121 | Air-fryer chicken katsu sandwiches                                | No | Not applicable |
| Better Homes & Gardens | September 2021      | 124 | Trailer mix energy balls                                          | No | Not applicable |
| Taste of Home          | February/March 2021 | 313 | Waffle-iron pizzas                                                | No | Not applicable |
| Taste of Home          | February/March 2021 | 317 | Parisian sipping chocolate                                        | No | Not applicable |
| Better Homes & Gardens | October 2020        | 523 | Moroccan chicken & cauliflower stew                               | No | Not applicable |
| Better Homes & Gardens | October 2020        | 524 | Pork & squash stew with ginger-red cabbage slaw                   | No | Not applicable |
| Better Homes & Gardens | October 2020        | 525 | Corn & potato stew with cornmeal dumplings                        | No | Not applicable |
| Better Homes & Gardens | October 2020        | 526 | Roasted beet chips                                                | No | Not applicable |
| Better Homes & Gardens | October 2020        | 528 | Chicken-lentil tacos                                              | No | Not applicable |
| Better Homes & Gardens | October 2020        | 529 | Dutch baby with caramelized apples                                | No | Not applicable |

|                        |               |     |                                                                   |    |                |
|------------------------|---------------|-----|-------------------------------------------------------------------|----|----------------|
| Better Homes & Gardens | October 2020  | 530 | Butternut squash & fettuccine alfredo                             | No | Not applicable |
| Better Homes & Gardens | November 2020 | 531 | Ginger-cranberry relish                                           | No | Not applicable |
| Better Homes & Gardens | November 2020 | 534 | Spiced apple rings with beets                                     | No | Not applicable |
| Better Homes & Gardens | November 2020 | 535 | Red cabbage & radicchio slaw                                      | No | Not applicable |
| Better Homes & Gardens | November 2020 | 536 | Bananas foster crisp                                              | No | Not applicable |
| Better Homes & Gardens | November 2020 | 538 | Orange-almond cake with cranberry curd                            | No | Not applicable |
| Better Homes & Gardens | November 2020 | 539 | Brioche bread pudding muffins with maple caramel                  | No | Not applicable |
| Better Homes & Gardens | November 2020 | 540 | Whiskey and cream pumpkin tart with pecan butter shortbread crust | No | Not applicable |
| Better Homes & Gardens | November 2020 | 541 | Pear tarts with caramelized pastry cream                          | No | Not applicable |
| Better Homes & Gardens | November 2020 | 542 | Sweet potato marshmallow meringue pie                             | No | Not applicable |
| Better Homes & Gardens | November 2020 | 544 | Winter pear salad                                                 | No | Not applicable |
| Better Homes & Gardens | November 2020 | 545 | Poached pears                                                     | No | Not applicable |
| Better Homes & Gardens | November 2020 | 546 | Pear-rosemary potato gratin                                       | No | Not applicable |
| Better Homes & Gardens | November 2020 | 547 | Peppery pear-vanilla scones                                       | No | Not applicable |
| Better Homes & Gardens | November 2020 | 548 | Savory pears and squash with granola tumble                       | No | Not applicable |
| Better Homes & Gardens | November 2020 | 550 | Fire-roasted tomato strata                                        | No | Not applicable |
| Better Homes & Gardens | November 2020 | 551 | 2020 Glazed roasted turkey                                        | No | Not applicable |
| Better Homes & Gardens | November 2020 | 552 | 2020 Glazed roasted turkey: double mustard-brown sugar glaze      | No | Not applicable |
| Better Homes & Gardens | November 2020 | 553 | 2020 Glazed roasted turkey: hot honey-sesame glaze                | No | Not applicable |



|                        |               |     |                                                  |    |                |
|------------------------|---------------|-----|--------------------------------------------------|----|----------------|
| Better Homes & Gardens | November 2020 | 556 | Roasted squash: Maple-almond butter              | No | Not applicable |
| Better Homes & Gardens | November 2020 | 557 | Roasted squash: Ginger-sesame                    | No | Not applicable |
| Better Homes & Gardens | December 2020 | 562 | Tamales coloraditos                              | No | Not applicable |
| Better Homes & Gardens | December 2020 | 563 | Crispy latkes                                    | No | Not applicable |
| Better Homes & Gardens | December 2020 | 564 | Bread bowls                                      | No | Not applicable |
| Better Homes & Gardens | December 2020 | 566 | Skillet corn bread                               | No | Not applicable |
| Better Homes & Gardens | December 2020 | 568 | Skillet corn bread: hot pepper jelly             | No | Not applicable |
| Better Homes & Gardens | December 2020 | 569 | Shrimp bisque                                    | No | Not applicable |
| Better Homes & Gardens | December 2020 | 570 | Triple-ginger cookies                            | No | Not applicable |
| Better Homes & Gardens | December 2020 | 571 | Triple-ginger cookies: ginger sugar              | No | Not applicable |
| Better Homes & Gardens | December 2020 | 572 | Reverse-sear prime rib with soy-ginger gravy     | No | Not applicable |
| Better Homes & Gardens | December 2020 | 573 | Chocolate-orange sandwich cookies                | No | Not applicable |
| Better Homes & Gardens | December 2020 | 574 | Raspberry marbled shortbread                     | No | Not applicable |
| Better Homes & Gardens | December 2020 | 575 | Peppermint-chocolate brookies                    | No | Not applicable |
| Better Homes & Gardens | December 2020 | 576 | Almond sugar cookies: buttercream frosting       | No | Not applicable |
| Better Homes & Gardens | December 2020 | 577 | Latte spritzes                                   | No | Not applicable |
| Better Homes & Gardens | December 2020 | 578 | Latte spritzes: coffee cream icing               | No | Not applicable |
| Better Homes & Gardens | December 2020 | 579 | Limoncello cheesecake bars                       | No | Not applicable |
| Better Homes & Gardens | December 2020 | 580 | Limoncello cheesecake bars: candied lemon slices | No | Not applicable |
| Better Homes & Gardens | December 2020 | 581 | Citrus shimmer                                   | No | Not applicable |
| Better Homes & Gardens | December 2020 | 582 | Almond sugar cookies                             | No | Not applicable |

|                        |               |     |                                                                                      |    |                |
|------------------------|---------------|-----|--------------------------------------------------------------------------------------|----|----------------|
| Better Homes & Gardens | December 2020 | 584 | Almond sugar cookies: royal icing                                                    | No | Not applicable |
| Better Homes & Gardens | December 2020 | 585 | Gingerbread cinnamon rolls                                                           | No | Not applicable |
| Better Homes & Gardens | December 2020 | 586 | Gingerbread cinnamon rolls: spiced brown butter frosting                             | No | Not applicable |
| Better Homes & Gardens | January 2021  | 587 | Origami fish packets                                                                 | No | Not applicable |
| Better Homes & Gardens | January 2021  | 588 | Flounder grenobloise                                                                 | No | Not applicable |
| Better Homes & Gardens | January 2021  | 589 | Crispy seasoned fish & chips with green olive tartar sauce: green olive tartar sauce | No | Not applicable |
| Better Homes & Gardens | January 2021  | 590 | Buttermilk caramel cake                                                              | No | Not applicable |
| Better Homes & Gardens | January 2021  | 592 | Braised cabbage collards                                                             | No | Not applicable |
| Better Homes & Gardens | January 2021  | 594 | Grapefruit, champagne & vodka spritz                                                 | No | Not applicable |
| Better Homes & Gardens | January 2021  | 595 | Fried green tomatillos & aioli                                                       | No | Not applicable |
| Better Homes & Gardens | January 2021  | 596 | Black-eyed pea succotash                                                             | No | Not applicable |
| Better Homes & Gardens | January 2021  | 597 | Cheesy grits cakes                                                                   | No | Not applicable |
| Better Homes & Gardens | January 2021  | 598 | Brown butter chicken & rice                                                          | No | Not applicable |
| Better Homes & Gardens | January 2021  | 599 | Herbed skillet pastitsio                                                             | No | Not applicable |
| Better Homes & Gardens | January 2021  | 600 | Chicken pot pie soup                                                                 | No | Not applicable |
| Better Homes & Gardens | January 2021  | 601 | Veggie-pesto lasagna soup                                                            | No | Not applicable |
| Better Homes & Gardens | January 2021  | 602 | Loaded baked potato soup                                                             | No | Not applicable |
| Better Homes & Gardens | February 2021 | 604 | Turmeric-ginger tea                                                                  | No | Not applicable |
| Better Homes & Gardens | February 2021 | 605 | Berry-ginger green tea sipper                                                        | No | Not applicable |
| Better Homes & Gardens | February 2021 | 609 | Roasted garlic-goat cheese pizza                                                     | No | Not applicable |

|                        |               |     |                                                                      |    |                |
|------------------------|---------------|-----|----------------------------------------------------------------------|----|----------------|
| Better Homes & Gardens | February 2021 | 610 | Carne asada burrito bowl                                             | No | Not applicable |
| Better Homes & Gardens | February 2021 | 611 | Homemade pizza dough                                                 | No | Not applicable |
| Better Homes & Gardens | February 2021 | 612 | Veggie banh mi pizza                                                 | No | Not applicable |
| Better Homes & Gardens | February 2021 | 613 | Ramen noodle salad                                                   | No | Not applicable |
| Better Homes & Gardens | February 2021 | 614 | Ramen noodle salad: ginger-soy vinaigrette                           | No | Not applicable |
| Better Homes & Gardens | February 2021 | 615 | Tahini, grain & veggie bowl                                          | No | Not applicable |
| Better Homes & Gardens | February 2021 | 616 | Sour cream donut holes with raspberry sugar & glaze                  | No | Not applicable |
| Better Homes & Gardens | February 2021 | 617 | Sour cream donut holes with raspberry sugar & glaze: raspberry glaze | No | Not applicable |
| Better Homes & Gardens | February 2021 | 618 | Sour cream donut holes with raspberry sugar & glaze: raspberry sugar | No | Not applicable |
| Better Homes & Gardens | February 2021 | 619 | Strawberry-cardamom turnovers                                        | No | Not applicable |
| Better Homes & Gardens | February 2021 | 620 | Mini chocolate peanut butter pies                                    | No | Not applicable |
| Better Homes & Gardens | February 2021 | 621 | Shawarma-spiced halloumi and vegetables                              | No | Not applicable |
| Better Homes & Gardens | February 2021 | 622 | Flank Steak tagliata with arugula & parmesan                         | No | Not applicable |
| Better Homes & Gardens | February 2021 | 623 | Spicy broccoli rabe & chickpea skillet                               | No | Not applicable |
| Better Homes & Gardens | February 2021 | 625 | Pesto pasta with charred radicchio                                   | No | Not applicable |
| Better Homes & Gardens | February 2021 | 626 | Broiled swordfish with fennel-caper slaw                             | No | Not applicable |
| Better Homes & Gardens | February 2021 | 627 | Cacio e pepe farinata                                                | No | Not applicable |
| Better Homes & Gardens | November 2020 |     | Poached pears: white wine poaching liquid                            | No | Not applicable |
| Better Homes & Gardens | November 2020 |     | Poached pears: red wine-pomegranate poaching liquid                  | No | Not applicable |

|                        |                            |     |                                                                     |     |                |
|------------------------|----------------------------|-----|---------------------------------------------------------------------|-----|----------------|
| Better Homes & Gardens | November 2020              |     | Poached pears: citrus-maple poaching liquid                         | No  | Not applicable |
| Better Homes & Gardens | February 2021              |     | Carmelized onion jam and goat cheese crostini                       | No  | Not applicable |
| Taste of Home          | June/July 2021             | 74  | Strawberry shortbread squares                                       | No  | Not applicable |
| Taste of Home          | August/September 2021      | 106 | Snack bar: roasted nuts                                             | No  | Not applicable |
| Taste of Home          | August/September 2021      | 107 | Snack bar: cheese board                                             | No  | Not applicable |
| Taste of Home          | August/September 2021      | 108 | Snack bar: s'mores bar                                              | No  | Not applicable |
| Taste of Home          | October/November 2020      | 197 | Ready, set...roll!                                                  | No  | Not applicable |
| US Weekly              | 25 October 2021            | 997 | Chocolate dipped halloween pretzels                                 | No  | Not applicable |
| US Weekly              | 25 October 2021            | 998 | The haunted graveyard                                               | No  | Not applicable |
| Taste of Home          | February/March 2021        | 284 | Savory roasted chicken                                              | Yes | Onion Salt     |
| AARP                   | December 2020/January 2021 | 916 | Cream biscuits                                                      | Yes | Salt           |
| AARP                   | February/March 2021        | 938 | What's hot? Sheet pan meals: za'atar chicken, potatoes and broccoli | Yes | Salt           |
| AARP                   | February/March 2021        | 939 | What's hot? Sheet pan meals: Mediterranean halibut                  | Yes | Salt           |
| AARP                   | February/March 2021        | 940 | What's hot? Sheet pan meals: flank steak fajitas                    | Yes | Salt           |
| AARP                   | April/May 2021             | 926 | 12 new uses for strawberries: quick jam                             | Yes | Salt           |
| AARP                   | April/May 2021             | 929 | 12 new uses for strawberries: salad dressing                        | Yes | Salt           |
| Cosmopolitan           | May/June 2021              | 954 | Choose your own egg adventure: brunch bowl                          | Yes | Salt           |
| Cosmopolitan           | May/June 2021              | 957 | Choose your own egg adventure: French toast                         | Yes | Salt           |
| Cosmopolitan           | May/June 2021              | 959 | Choose your own egg adventure: kinda carbonara                      | Yes | Salt           |

|                       |                |     |                                                                                                 |     |      |
|-----------------------|----------------|-----|-------------------------------------------------------------------------------------------------|-----|------|
| Cosmopolitan          | October 2021   | 968 | Make yourself a pot of soup already: grandma-esque chicken soup                                 | Yes | Salt |
| Cosmopolitan          | November 2021  | 977 | These 3 dips will win you most popular at the Friendsgiving table: guan 'n' cranberries dip     | Yes | Salt |
| Cosmopolitan          | November 2021  | 978 | These 3 dips will win you most popular at the Friendsgiving table: brussels and artichoke dip   | Yes | Salt |
| Cosmopolitan          | November 2021  | 979 | These 3 dips will win you most popular at the Friendsgiving table: buttenut buffalo chicken dip | Yes | Salt |
| Cosmopolitan          | November 2021  | 980 | ATTN: your chicken wants you to stuff it                                                        | Yes | Salt |
| Cosmopolitan          | November 2020  | 981 | Thanksgiving chicken is what micro-Friendsgiving dreams are made of                             | Yes | Salt |
| Cosmopolitan          | June 2020      | 987 | DIY dipping sauces that make veggies taste like takeout: somewhat healthy spicy mayo            | Yes | Salt |
| Cosmopolitan          | June 2020      | 988 | DIY dipping sauces that make veggies taste like takeout: basic betch pesto                      | Yes | Salt |
| Cosmopolitan          | June 2020      | 990 | DIY dipping sauces that make veggies taste like takeout: fancy honey mustard                    | Yes | Salt |
| Cosmopolitan          | October 2021   | 969 | Make yourself a pot of soup already (mexican-ish veggie soup)                                   | Yes | Salt |
| Cosmopolitan          | October 2021   | 970 | Make yourself a pot of soup already (almost minestrone)                                         | Yes | Salt |
| Good Housekeepin<br>g | September 2021 | 656 | Roasted chicken & tomatoes                                                                      | Yes | Salt |

|                   |                |     |                                      |     |      |
|-------------------|----------------|-----|--------------------------------------|-----|------|
| Good Housekeeping | September 2021 | 657 | Fresh zucchini salad                 | Yes | Salt |
| Good Housekeeping | September 2021 | 658 | Grilled citrus zucchini              | Yes | Salt |
| Good Housekeeping | September 2021 | 659 | Cheesy zucchini crisps               | Yes | Salt |
| Good Housekeeping | September 2020 | 672 | Fresh side                           | Yes | Salt |
| Good Housekeeping | September 2020 | 673 | No-cook marinara                     | Yes | Salt |
| Good Housekeeping | September 2020 | 674 | Stuffed tomatoes                     | Yes | Salt |
| Good Housekeeping | October 2020   | 691 | Crispy pork cutlets                  | Yes | Salt |
| Good Housekeeping | October 2020   | 692 | Roasted chili-lime drumsticks        | Yes | Salt |
| Good Housekeeping | October 2020   | 693 | Curry-poached salmon with peppers    | Yes | Salt |
| Good Housekeeping | October 2020   | 694 | Pumpkin alfredo penne                | Yes | Salt |
| Good Housekeeping | October 2020   | 695 | Paprika steak with lentils & spinach | Yes | Salt |
| Good Housekeeping | October 2020   | 696 | Minty peas                           | Yes | Salt |
| Good Housekeeping | October 2020   | 697 | Tomato relish                        | Yes | Salt |
| Good Housekeeping | October 2020   | 698 | Couscous with apricot vinaigrette    | Yes | Salt |

|                   |                  |     |                                   |     |      |
|-------------------|------------------|-----|-----------------------------------|-----|------|
| Good Housekeeping | October 2020     | 699 | Creamy green chile sauce          | Yes | Salt |
| Good Housekeeping | October 2020     | 700 | Scallion-ginger sauce             | Yes | Salt |
| Good Housekeeping | November 2020    | 706 | Kabocha squash: maple-thyme roast | Yes | Salt |
| Good Housekeeping | November 2020    | 707 | Kabocha squash: slow-cooker curry | Yes | Salt |
| Good Housekeeping | November 2020    | 708 | Kabocha squash: squash toasts     | Yes | Salt |
| Good Housekeeping | November 2020    | 716 | Orange-buttermilk chess pie       | Yes | Salt |
| Good Housekeeping | November 2020    | 721 | Spiced pumpkin pie                | Yes | Salt |
| Good Housekeeping | November 2020    | 724 | Old-fashioned pecan pie           | Yes | Salt |
| Good Housekeeping | May 2021         | 732 | Asparagus-leek pasta              | Yes | Salt |
| Good Housekeeping | May 2021         | 758 | Artichokes: to roast              | Yes | Salt |
| Good Housekeeping | May 2021         | 759 | Artichokes: to grill              | Yes | Salt |
| Good Housekeeping | March 2021       | 765 | Mint: green pea couscous          | Yes | Salt |
| Good Housekeeping | March 2021       | 766 | Mint: mint & walnut pesto         | Yes | Salt |
| Good Housekeeping | July/August 2021 | 825 | Corn: couscous salad              | Yes | Salt |

|                   |                       |     |                                                    |     |      |
|-------------------|-----------------------|-----|----------------------------------------------------|-----|------|
| Good Housekeeping | July/August 2021      | 826 | Corn: shrimp fritters                              | Yes | Salt |
| Good Housekeeping | January/February 2021 | 837 | Rigatoni with vodka sauce                          | Yes | Salt |
| Good Housekeeping | January/February 2021 | 840 | Crispy chicken thighs with buttermilk fennel salad | Yes | Salt |
| Good Housekeeping | January/February 2021 | 841 | Cod in parchment with orange-leek couscous         | Yes | Salt |
| Good Housekeeping | January/February 2021 | 844 | Balsamic-glazed sirloin with farro pilaf           | Yes | Salt |
| Good Housekeeping | January/February 2021 | 848 | Banh Mi sandwiches                                 | Yes | Salt |
| Good Housekeeping | January/February 2021 | 850 | Tangy avocado dip                                  | Yes | Salt |
| Good Housekeeping | January/February 2021 | 851 | Yogurt sauce                                       | Yes | Salt |
| Good Housekeeping | January/February 2021 | 854 | Endive: fennel-apple salad                         | Yes | Salt |
| Good Housekeeping | January/February 2021 | 855 | Endive: citrus relish cups                         | Yes | Salt |
| Good Housekeeping | January/February 2021 | 856 | Endive: roasted greens with walnuts                | Yes | Salt |
| Good Housekeeping | December 2020         | 865 | Beef and vegetable curry                           | Yes | Salt |
| Good Housekeeping | December 2020         | 866 | Warm roasted cauliflower and spinach salad         | Yes | Salt |
| Good Housekeeping | December 2020         | 870 | Lime & Aleppo pepper green beans                   | Yes | Salt |



|                   |                       |     |                                                            |     |      |
|-------------------|-----------------------|-----|------------------------------------------------------------|-----|------|
| Good Housekeeping | December 2020         | 871 | Instant oatmeal with cranberries and pecans                | Yes | Salt |
| Good Housekeeping | December 2020         | 875 | Sheet pan chicken nachos                                   | Yes | Salt |
| Good Housekeeping | December 2020         | 879 | Roasted salmon with charred lemon vinaigrette              | Yes | Salt |
| Good Housekeeping | April 2021            | 907 | Scallions: tomato vinaigrette                              | Yes | Salt |
| Good Housekeeping | April 2021            | 908 | Scallions: spring herb frittata                            | Yes | Salt |
| Good Housekeeping | November 2020         |     | Decadent chocolate-espresso pie: for pie                   | Yes | Salt |
| Good Housekeeping | July/August 2020      |     | Tangy relish                                               | Yes | Salt |
| People            | 26 July 2021          | 640 | Mango kulfi pops                                           | Yes | Salt |
| People            | 26 July 2021          | 641 | Cacio e pepe with parmesan crisps                          | Yes | Salt |
| People            | 26 July 2021          | 642 | Grilled chile-maple chicken with tomato & watermelon salad | Yes | Salt |
| US Weekly         | 30 August 2021        | 993 | Passion-fruit basil margarita                              | Yes | Salt |
| Taste of Home     | August/September 2020 | 125 | Apple-carrot slaw with pistachios                          | Yes | Salt |
| Taste of Home     | August/September 2020 | 127 | Crispy orange chicken                                      | Yes | Salt |
| Taste of Home     | August/September 2020 | 129 | Summer garden pasta with chicken sausage                   | Yes | Salt |
| Taste of Home     | August/September 2020 | 135 | Moroccan chicken thighs                                    | Yes | Salt |
| Taste of Home     | August/September 2020 | 136 | Grilled jerk shrimp orzo salad                             | Yes | Salt |
| Taste of Home     | August/September 2020 | 140 | Turkey alfredo pizza                                       | Yes | Salt |
| Taste of Home     | August/September 2020 | 142 | Glazed parmesan potatoes                                   | Yes | Salt |

|               |                       |     |                                         |     |      |
|---------------|-----------------------|-----|-----------------------------------------|-----|------|
| Taste of Home | August/September 2020 | 143 | Mashed cauliflower                      | Yes | Salt |
| Taste of Home | August/September 2020 | 144 | Simple Harvard beets                    | Yes | Salt |
| Taste of Home | August/September 2020 | 145 | Slow-cooker chicken parmesan            | Yes | Salt |
| Taste of Home | August/September 2020 | 146 | Cheddar-topped barbecue meat flour      | Yes | Salt |
| Taste of Home | August/September 2020 | 148 | Rustic caramel apple tart               | Yes | Salt |
| Taste of Home | August/September 2020 | 149 | Apple pear cake                         | Yes | Salt |
| Taste of Home | August/September 2020 | 151 | Slow-cooker apple pudding cake          | Yes | Salt |
| Taste of Home | August/September 2020 | 152 | Caramel apple muffins                   | Yes | Salt |
| Taste of Home | August/September 2020 | 153 | Apple Betty with almond cream           | Yes | Salt |
| Taste of Home | August/September 2020 | 156 | Pennsylvania Dutch chocolate funny cake | Yes | Salt |
| Taste of Home | August/September 2020 | 157 | Homemade tortillas                      | Yes | Salt |
| Taste of Home | August/September 2020 | 160 | Popcorn shrimp tacos with cabbage slaw  | Yes | Salt |
| Taste of Home | August/September 2020 | 162 | Fruity chicken salad pitas              | Yes | Salt |
| Taste of Home | August/September 2020 | 164 | Rosemary salmon & veggies               | Yes | Salt |
| Taste of Home | October/November 2020 | 170 | Brownie haunted house                   | Yes | Salt |
| Taste of Home | October/November 2020 | 174 | Mushroom pork ragout                    | Yes | Salt |
| Taste of Home | October/November 2020 | 176 | Ground beef Wellingtons                 | Yes | Salt |
| Taste of Home | October/November 2020 | 178 | Irish beef stew                         | Yes | Salt |
| Taste of Home | October/November 2020 | 180 | The best sweet potato pie               | Yes | Salt |
| Taste of Home | October/November 2020 | 183 | Elegant green beans                     | Yes | Salt |
| Taste of Home | October/November 2020 | 187 | Rosemary turkey breast                  | Yes | Salt |

|               |                       |     |                                             |     |      |
|---------------|-----------------------|-----|---------------------------------------------|-----|------|
| Taste of Home | October/November 2020 | 188 | Minted beet salad                           | Yes | Salt |
| Taste of Home | October/November 2020 | 189 | Green bean bundles                          | Yes | Salt |
| Taste of Home | October/November 2020 | 192 | French toast spirals                        | Yes | Salt |
| Taste of Home | October/November 2020 | 193 | Maple bacon walnut coffee cake              | Yes | Salt |
| Taste of Home | October/November 2020 | 194 | Maple pecan pie                             | Yes | Salt |
| Taste of Home | October/November 2020 | 196 | Cristen's giant cinnamon rolls              | Yes | Salt |
| Taste of Home | October/November 2020 | 209 | Classic butter pie crust dough              | Yes | Salt |
| Taste of Home | October/November 2020 | 210 | Chicken with pumpkin alfredo                | Yes | Salt |
| Taste of Home | October/November 2020 | 211 | Pumpkin & chicken sausage hash              | Yes | Salt |
| Taste of Home | October/November 2020 | 212 | Pumpkin clam chowder                        | Yes | Salt |
| Taste of Home | October/November 2020 | 213 | Ganache-topped pumpkin tart                 | Yes | Salt |
| Taste of Home | October/November 2020 | 214 | Snickerdoodle pumpkin bread                 | Yes | Salt |
| Taste of Home | October/November 2020 | 215 | Pumpkin rugelach with cream cheese icing    | Yes | Salt |
| Taste of Home | October/November 2020 | 216 | Chipotle pumpkin chicken pizza              | Yes | Salt |
| Taste of Home | October/November 2020 | 219 | Mini corn dogs                              | Yes | Salt |
| Taste of Home | October/November 2020 | 221 | Spicy oatmeal cookie mix                    | Yes | Salt |
| Taste of Home | December/January 2021 | 226 | Portuguese shrimp                           | Yes | Salt |
| Taste of Home | December/January 2021 | 228 | Chocolate-hazelnut espresso cinnamon rolls  | Yes | Salt |
| Taste of Home | December/January 2021 | 229 | Easy cheesy cauliflower breakfast casserole | Yes | Salt |
| Taste of Home | December/January 2021 | 247 | Christmas star twisted bread                | Yes | Salt |
| Taste of Home | December/January 2021 | 249 | Duo tater bake                              | Yes | Salt |

|               |                       |     |                                                             |     |      |
|---------------|-----------------------|-----|-------------------------------------------------------------|-----|------|
| Taste of Home | December/January 2021 | 250 | Maple-gingerroot vegetables                                 | Yes | Salt |
| Taste of Home | December/January 2021 | 251 | Pumpkin egg braid                                           | Yes | Salt |
| Taste of Home | December/January 2021 | 254 | Triple-cheese broccoli puff                                 | Yes | Salt |
| Taste of Home | December/January 2021 | 257 | Fruitcake cookies                                           | Yes | Salt |
| Taste of Home | December/January 2021 | 258 | Mocha-walnut macarons                                       | Yes | Salt |
| Taste of Home | December/January 2021 | 261 | Roasted brussels sprouts with sriracha aioli                | Yes | Salt |
| Taste of Home | December/January 2021 | 263 | Cauliflower au gratin                                       | Yes | Salt |
| Taste of Home | December/January 2021 | 265 | Smoked macaroni & cheese                                    | Yes | Salt |
| Taste of Home | December/January 2021 | 268 | Tropical sweet potato bake                                  | Yes | Salt |
| Taste of Home | December/January 2021 | 269 | Jalapeno sausage quiche                                     | Yes | Salt |
| Taste of Home | December/January 2021 | 271 | Mama's coconut pie                                          | Yes | Salt |
| Taste of Home | December/January 2021 | 272 | Pineapple salsa                                             | Yes | Salt |
| Taste of Home | December/January 2021 | 277 | Potato latke funnel cakes                                   | Yes | Salt |
| Taste of Home | February/March 2021   | 278 | Chimichangas                                                | Yes | Salt |
| Taste of Home | February/March 2021   | 280 | Cinnamon toasted almonds                                    | Yes | Salt |
| Taste of Home | February/March 2021   | 286 | Spinach chicken frittata                                    | Yes | Salt |
| Taste of Home | February/March 2021   | 288 | Cranberry Nutella sandwich cookies                          | Yes | Salt |
| Taste of Home | February/March 2021   | 289 | Brownie kiss cupcakes                                       | Yes | Salt |
| Taste of Home | February/March 2021   | 293 | Tabouleh                                                    | Yes | Salt |
| Taste of Home | February/March 2021   | 308 | Beer & bacon macaroni & cheese                              | Yes | Salt |
| Taste of Home | February/March 2021   | 311 | Crispy coconut chicken nuggets with creamy Carribbean salsa | Yes | Salt |

|               |                     |     |                                               |     |      |
|---------------|---------------------|-----|-----------------------------------------------|-----|------|
| Taste of Home | February/March 2021 | 312 | The best French toast                         | Yes | Salt |
| Taste of Home | February/March 2021 | 314 | Feta-stuffed kibbeh with harissa              | Yes | Salt |
| Taste of Home | February/March 2021 | 315 | Ceylon chicken curry & rice noodle soup       | Yes | Salt |
| Taste of Home | February/March 2021 | 316 | Finnish cheese pie                            | Yes | Salt |
| Taste of Home | February/March 2021 | 318 | Conchas (seashells)                           | Yes | Salt |
| Taste of Home | February/March 2021 | 319 | Peachy Danish pancake balls (Æbleskiver)      | Yes | Salt |
| Taste of Home | February/March 2021 | 321 | Vegan butter cauliflower                      | Yes | Salt |
| Taste of Home | February/March 2021 | 322 | Indonesian bananas foster                     | Yes | Salt |
| Taste of Home | February/March 2021 | 326 | Whiskey barbecue pork                         | Yes | Salt |
| Taste of Home | February/March 2021 | 328 | Romesco sauce                                 | Yes | Salt |
| Taste of Home | February/March 2021 | 329 | Ash's sweet & spicy enchilada sauce           | Yes | Salt |
| Taste of Home | April/May 2021      | 330 | Air-fryer Nashville hot chicken               | Yes | Salt |
| Taste of Home | April/May 2021      | 334 | Rustic fish chowder                           | Yes | Salt |
| Taste of Home | April/May 2021      | 335 | Alfredo sauce                                 | Yes | Salt |
| Taste of Home | April/May 2021      | 336 | Alfredo sauce: Chicken alfredo sandwiches     | Yes | Salt |
| Taste of Home | April/May 2021      | 339 | Homemade marinara sauce                       | Yes | Salt |
| Taste of Home | April/May 2021      | 340 | Homemade marinara sauce: Meatball subs        | Yes | Salt |
| Taste of Home | April/May 2021      | 341 | Homemade marinara sauce: Italian chicken stew | Yes | Salt |
| Taste of Home | April/May 2021      | 343 | Classic pesto                                 | Yes | Salt |
| Taste of Home | April/May 2021      | 345 | Classic pesto: BLT bruschetta                 | Yes | Salt |
| Taste of Home | April/May 2021      | 346 | Classic pesto: Pesto hamburgers               | Yes | Salt |

|               |                |     |                                              |     |      |
|---------------|----------------|-----|----------------------------------------------|-----|------|
| Taste of Home | April/May 2021 | 348 | Homemade biscuits & maple sausage gravy      | Yes | Salt |
| Taste of Home | April/May 2021 | 349 | Collards quiche                              | Yes | Salt |
| Taste of Home | April/May 2021 | 350 | Grits & sausage casserole                    | Yes | Salt |
| Taste of Home | April/May 2021 | 351 | Best strawberry shortcake                    | Yes | Salt |
| Taste of Home | April/May 2021 | 352 | Bacon hash brown bake                        | Yes | Salt |
| Taste of Home | April/May 2021 | 370 | Best deviled eggs                            | Yes | Salt |
| Taste of Home | April/May 2021 | 372 | Gluten-free brownie bars                     | Yes | Salt |
| Taste of Home | April/May 2021 | 375 | Garlic mozzarella bread bites                | Yes | Salt |
| Taste of Home | April/May 2021 | 377 | Red lentil hummus with brussels sprout hash  | Yes | Salt |
| Taste of Home | April/May 2021 | 380 | Gluten-free spiced sweet potato muffins      | Yes | Salt |
| Taste of Home | April/May 2021 | 381 | The best cashew cheese sauce                 | Yes | Salt |
| Taste of Home | April/May 2021 | 385 | Chewy cookies                                | Yes | Salt |
| Taste of Home | June/July 2021 | 388 | Almost It's-It ice cream sandwiches          | Yes | Salt |
| Taste of Home | June/July 2021 | 391 | Shrimp & scallops tropical salad             | Yes | Salt |
| Taste of Home | June/July 2021 | 393 | Dad's lemony grilled chicken                 | Yes | Salt |
| Taste of Home | June/July 2021 | 401 | Skewered lamb with blackberry-balsamic glaze | Yes | Salt |
| Taste of Home | June/July 2021 | 405 | Tomato galette with basil pesto & feta       | Yes | Salt |
| Taste of Home | June/July 2021 | 406 | Stir-fried zucchini                          | Yes | Salt |
| Taste of Home | June/July 2021 | 408 | Baked chicken & zucchini                     | Yes | Salt |
| Taste of Home | June/July 2021 | 409 | Summer zucchini pasta                        | Yes | Salt |
| Taste of Home | June/July 2021 | 410 | Chocolate zucchini cookies                   | Yes | Salt |

|               |                       |     |                                           |     |      |
|---------------|-----------------------|-----|-------------------------------------------|-----|------|
| Taste of Home | June/July 2021        | 411 | Carrot zucchini bread                     | Yes | Salt |
| Taste of Home | June/July 2021        | 412 | Green tomato salsa                        | Yes | Salt |
| Taste of Home | June/July 2021        | 415 | Fiesta corn                               | Yes | Salt |
| Taste of Home | June/July 2021        | 417 | Blue-ribbon beef nachos                   | Yes | Salt |
| Taste of Home | June/July 2021        | 432 | Gobi aloo                                 | Yes | Salt |
| Taste of Home | June/July 2021        | 433 | Samosas                                   | Yes | Salt |
| Taste of Home | June/July 2021        | 434 | Malai kofta                               | Yes | Salt |
| Taste of Home | June/July 2021        | 435 | Mint chutney                              | Yes | Salt |
| Taste of Home | June/July 2021        | 436 | Best ever vanilla ice cream               | Yes | Salt |
| Taste of Home | June/July 2021        | 437 | Grilled romaine salad                     | Yes | Salt |
| Taste of Home | June/July 2021        | 439 | Cherry plum slab pie with walnut streusel | Yes | Salt |
| Taste of Home | June/July 2021        | 445 | Peachy-keen halloumi fritters             | Yes | Salt |
| Taste of Home | June/July 2021        | 446 | Summer squash pound cake                  | Yes | Salt |
| Taste of Home | June/July 2021        | 447 | Healthy avocado pineapple muffins         | Yes | Salt |
| Taste of Home | June/July 2021        | 450 | Watermelon & cucumber salsa               | Yes | Salt |
| Taste of Home | June/July 2021        | 453 | S'mores cupcakes                          | Yes | Salt |
| Taste of Home | August/September 2021 | 455 | My juicy Lucy                             | Yes | Salt |
| Taste of Home | August/September 2021 | 459 | Black bean rice burgers                   | Yes | Salt |
| Taste of Home | August/September 2021 | 461 | Southwestern pork & squash soup           | Yes | Salt |
| Taste of Home | August/September 2021 | 463 | Garden chicken cacciatore                 | Yes | Salt |
| Taste of Home | August/September 2021 | 465 | Mexican street corn chowder               | Yes | Salt |

|               |                       |     |                                                   |     |      |
|---------------|-----------------------|-----|---------------------------------------------------|-----|------|
| Taste of Home | August/September 2021 | 466 | Salmon grilled in foil                            | Yes | Salt |
| Taste of Home | August/September 2021 | 467 | Sausage potato skillet                            | Yes | Salt |
| Taste of Home | August/September 2021 | 468 | Simple salsa chicken                              | Yes | Salt |
| Taste of Home | August/September 2021 | 471 | Oatmeal breakfast bars                            | Yes | Salt |
| Taste of Home | August/September 2021 | 473 | Muffin-tin scrambled eggs                         | Yes | Salt |
| Taste of Home | August/September 2021 | 474 | High-octane pancakes                              | Yes | Salt |
| Taste of Home | August/September 2021 | 475 | Freezer breakfast sandwiches                      | Yes | Salt |
| Taste of Home | August/September 2021 | 476 | Zucchini pizza fritters                           | Yes | Salt |
| Taste of Home | August/September 2021 | 477 | Philly cheesesteak egg rolls                      | Yes | Salt |
| Taste of Home | August/September 2021 | 478 | Spinach puffs                                     | Yes | Salt |
| Taste of Home | August/September 2021 | 480 | Chiles rellenos croque-madame                     | Yes | Salt |
| Taste of Home | August/September 2021 | 482 | Steak sandwiches with crispy onions               | Yes | Salt |
| Taste of Home | August/September 2021 | 485 | General Tso's chicken sandwich with broccoli slaw | Yes | Salt |
| Taste of Home | August/September 2021 | 486 | Toasted chicken salad sandwiches                  | Yes | Salt |
| Taste of Home | August/September 2021 | 488 | Lebanese street sandwiches                        | Yes | Salt |
| Taste of Home | August/September 2021 | 491 | Chewy soft pretzels                               | Yes | Salt |
| Taste of Home | August/September 2021 | 492 | Obatzda (German beer cheese dip)                  | Yes | Salt |
| Taste of Home | August/September 2021 | 493 | Apple matchstick salad                            | Yes | Salt |
| Taste of Home | October/November 2021 | 495 | Baked feta pasta                                  | Yes | Salt |
| Taste of Home | October/November 2021 | 497 | 30-minute coq au vin                              | Yes | Salt |
| Taste of Home | October/November 2021 | 499 | Fluffy banana pancakes                            | Yes | Salt |



|                        |                       |     |                                          |     |      |
|------------------------|-----------------------|-----|------------------------------------------|-----|------|
| Taste of Home          | October/November 2021 | 501 | Breakfast biscuit cups                   | Yes | Salt |
| Taste of Home          | October/November 2021 | 505 | Sweet candied carrots                    | Yes | Salt |
| Taste of Home          | October/November 2021 | 506 | Seasoned roast turkey                    | Yes | Salt |
| Taste of Home          | October/November 2021 | 507 | Mashed red potatoes                      | Yes | Salt |
| Taste of Home          | October/November 2021 | 509 | Candy corn cookies                       | Yes | Salt |
| Taste of Home          | October/November 2021 | 510 | Layered peanut butter brownies           | Yes | Salt |
| Taste of Home          | October/November 2021 | 515 | Creamy celery root & pearl onions        | Yes | Salt |
| Taste of Home          | October/November 2021 | 516 | Oysters Rockefeller egg rolls            | Yes | Salt |
| Taste of Home          | October/November 2021 | 517 | Butternut squash jumble                  | Yes | Salt |
| Taste of Home          | October/November 2021 | 518 | Sweet potato kale pilaf                  | Yes | Salt |
| Taste of Home          | October/November 2021 | 520 | Good witch/bad witch cake                | Yes | Salt |
| Better Homes & Gardens | April 2021            | 43  | Coconut curry sauce: pork coconut curry  | Yes | Salt |
| Better Homes & Gardens | September 2021        | 110 | Stuffed mini chaffles                    | Yes | Salt |
| Better Homes & Gardens | September 2021        | 111 | Baked hummingbird oatmeal                | Yes | Salt |
| Taste of Home          | February/March 2021   | 312 | The best French toast                    | Yes | Salt |
| Taste of Home          | February/March 2021   | 314 | Feta-stuffed kibbeh with harissa         | Yes | Salt |
| Taste of Home          | February/March 2021   | 315 | Ceylon chicken curry & rice noodle soup  | Yes | Salt |
| Taste of Home          | February/March 2021   | 316 | Finnish cheese pie                       | Yes | Salt |
| Taste of Home          | February/March 2021   | 318 | Conchas (seashells)                      | Yes | Salt |
| Taste of Home          | February/March 2021   | 319 | Peachy Danish pancake balls (Æbleskiver) | Yes | Salt |
| Better Homes & Gardens | November 2020         | 532 | Mashed potatoes                          | Yes | Salt |

|                        |                       |     |                                                             |     |                   |
|------------------------|-----------------------|-----|-------------------------------------------------------------|-----|-------------------|
| Better Homes & Gardens | November 2020         | 549 | Soufflé pancakes with maple-pear syrup                      | Yes | Salt              |
| Better Homes & Gardens | January 2021          | 591 | Crispy seasoned fish & chips with green olive tartar sauce  | Yes | Salt              |
| Better Homes & Gardens | January 2021          | 593 | Roasted pulled pork                                         | Yes | Salt              |
| Better Homes & Gardens | November 2020         |     | Sweet potato marshmallow meringue pie: marshmallow meringue | Yes | Salt              |
| Taste of Home          | June/July 2021        | 84  | Mini cupcakes: creamy white frosting                        | Yes | Salt              |
| Taste of Home          | December/January 2021 | 230 | Haute chocolate                                             | Yes | Salt              |
| Taste of Home          | February/March 2021   | 324 | Slow-cooked salsa                                           | Yes | Salt              |
| AARP                   | June/July 2021        |     | My long journey to a tasty veggie dish: grilled artichokes  | Yes | Sea salt          |
| People                 | 2 August 2021         | 651 | Seared scallops with cucumber & tomato relish               | Yes | Sea salt          |
| US Weekly              | 8 November 2021       |     | Cream cheese pound cake                                     | Yes | Sea salt          |
| Taste of Home          | August/September 2020 | 166 | Chili-topped cornbread waffles                              | Yes | Sea salt          |
| Taste of Home          | October/November 2020 | 195 | Pumpkin pie tartlets with maple pecan crust                 | Yes | Sea salt          |
| Taste of Home          | December/January 2021 | 241 | Swedish flop                                                | Yes | Sea salt          |
| Taste of Home          | February/March 2021   | 282 | Caribbean shrimp bowl                                       | Yes | Sea salt          |
| Taste of Home          | April/May 2021        | 347 | Vegan lemon poppy seed doughnuts                            | Yes | Sea salt          |
| Taste of Home          | April/May 2021        | 379 | Vegan chocolate mousse                                      | Yes | Sea salt          |
| Better Homes & Gardens | December 2020         | 567 | Skillet corn bread: whipped honey butter                    | Yes | Sea salt          |
| US Weekly              | 31 May 2021           | 992 | Bird bakery's tomato basil soup                             | Yes | Sea salt          |
| Taste of Home          | October/November 2020 | 182 | Maple-sage brined turkey                                    | Yes | Sea salt and salt |
| Taste of Home          | August/September 2020 | 158 | Flavorful chicken fajitas                                   | Yes | Seasoned salt     |

|               |                       |     |                          |     |               |
|---------------|-----------------------|-----|--------------------------|-----|---------------|
| Taste of Home | February/March 2021   | 310 | Baked pasta puttanesca   | Yes | Seasoned salt |
| Taste of Home | June/July 2021        | 413 | Mexican steak fajitas    | Yes | Seasoned salt |
| Taste of Home | August/September 2020 | 132 | Meatball flatbread       | Yes | Yes           |
| Taste of Home | August/September 2020 | 133 | Parmesan pork tenderloin | Yes | Yes           |
| Taste of Home | October/November 2020 | 177 | Swiss potato soup        | Yes | Yes           |
